# Supplementary material for: Identification of novel small-molecule inhibitors targeting menin–MLL interaction, repurposing the antidiarrheal loperamide
Source: Royal Society of Chemistry journal article supplement (doi:10.1039/c6ob01248e), 2016-01-01

## Supplementary Information

### Identification of novel small-molecule inhibitors targeting menin-MLL interaction, repurposing the antidiarrheals loperamide

Liyan Yue,<sup>‡a,b</sup> Juanjuan Du,<sup>‡c</sup> Fei Ye,<sup>‡d</sup> Zhifeng Chen,<sup>e</sup> Lianchun Li,<sup>f</sup> Fulin Lian,<sup>a,b</sup>  
Bidong Zhang,<sup>a,b</sup> Yuanyuan Zhang,<sup>a,b,\*</sup> Hualiang Jiang,<sup>a,b</sup> Kaixian Chen,<sup>a,e</sup> Yuanchao  
Li,<sup>c</sup> Bing Zhou,<sup>c</sup> Yaxi Yang,<sup>c,\*</sup> and Cheng Luo<sup>a,e,\*</sup>

<sup>a</sup>State Key Laboratory of Drug Research, Shanghai Institute of Materia Medica,  
Chinese Academy of Sciences, Shanghai 201203, China.

<sup>b</sup>University of Chinese Academy of Sciences, No.19A Yuquan Road, Beijing  
100049, China

<sup>c</sup>Department of Medicinal Chemistry, Shanghai Institute of Materia Medica, Chinese  
Academy of Sciences, Shanghai 201203, China.

<sup>d</sup>Zhejiang Sci-Tech University, College of Life Sciences, Hangzhou, China.

<sup>e</sup>School of Life Science and Technology, Shanghai Tech University, Shanghai  
200031, China.

<sup>f</sup>Guangxi Key Laboratory of Functional Phytochemicals Research and Utilization,  
Guangxi Institute of Botany, Guangxi Zhuang Autonomous Region and Chinese  
Academy of Sciences, Guilin 541006, China.

<sup>‡</sup> These authors contributed equally to this work.

\* Correspondence: Yaxi Yang ([yangyaxi@simm.ac.cn](mailto:yangyaxi@simm.ac.cn)), Yuanyuan Zhang  
([10110700070@fudan.edu.cn](mailto:10110700070@fudan.edu.cn)) and Cheng Luo ([cluo@simm.ac.cn](mailto:cluo@simm.ac.cn))

## Table of Contents

|                                                    |     |
|----------------------------------------------------|-----|
| Supplementary Table 1 .....                        | S3  |
| Supplementary Table 2 .....                        | S4  |
| Supplementary Figure 1 .....                       | S5  |
| Supplementary Figure 2 .....                       | S6  |
| Supplementary Figure 3 .....                       | S7  |
| Procedures and Products .....                      | S8  |
| Supplementary Table 3 .....                        | S30 |
| $^1\text{H}$ and $^{13}\text{C}$ NMR spectra ..... | S31 |

**Supplementary Table 1. Protein thermal shift assay demonstrated the binding of loperamide-based analogues to menin.**  $\Delta T_m$  values were calculated as a  $T_m$  difference between menin mixed with the 20  $\mu$ M compound and menin mixed with DMSO.

| <b>Compound</b> | <b><math>\Delta T_m</math> (<math>^{\circ}</math>C)</b> |
|-----------------|---------------------------------------------------------|
| DMSO            | —                                                       |
| DC_YM22         | $5.04 \pm 0.65$                                         |
| DC_YM23         | $2.20 \pm 0.31$                                         |
| DC_YM24         | $2.01 \pm 0.40$                                         |
| DC_YM26         | $4.81 \pm 0.51$                                         |
| DC_YM27         | $3.49 \pm 0.60$                                         |
| MBM1            | $4.28 \pm 0.36$                                         |

**Supplementary Table 2. AlamarBlue cell viability assay of human leukemia cells MV4;11 after 7 day's treatment with inhibitors.**

| <b>Compound</b> | <b>GI<sub>50</sub> (μM)</b> |
|-----------------|-----------------------------|
| DC_YM22         | 3.20 ± 0.20                 |
| DC_YM24         | 3.34 ± 1.06                 |
| DC_YM26         | 2.96 ± 0.91                 |
| MI-2-2          | 2.37 ± 0.81                 |

**Supplementary Figure 1.**

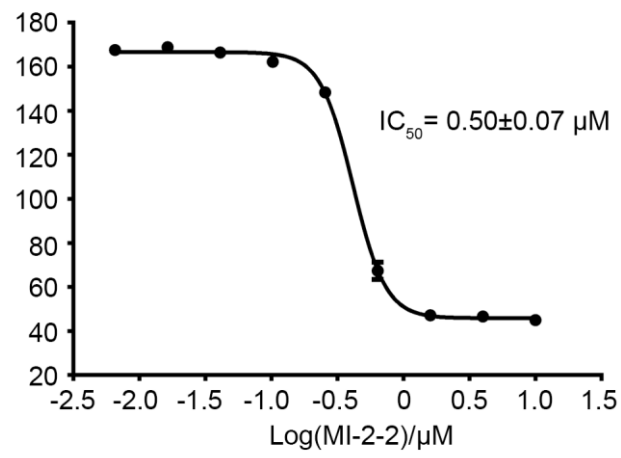

**Supplementary Figure 1. FP assays determine the IC<sub>50</sub> value of MI-2-2.**

Supplementary Figure 2.

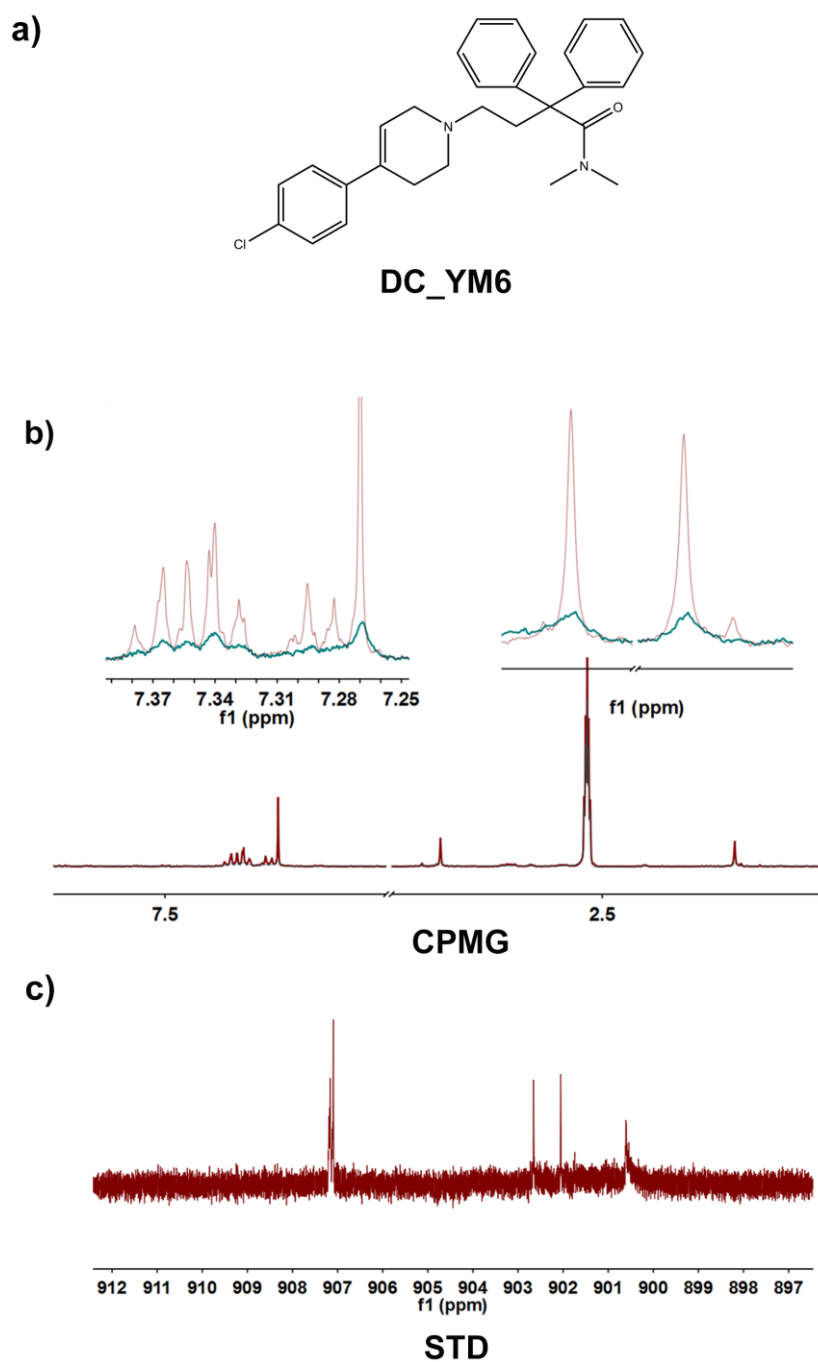

Supplementary Figure 2. NMR CPMG (b) and STD (c) experiments demonstrate direct binding of DC\_YM6 to menin.

**Supplementary Figure 3.**

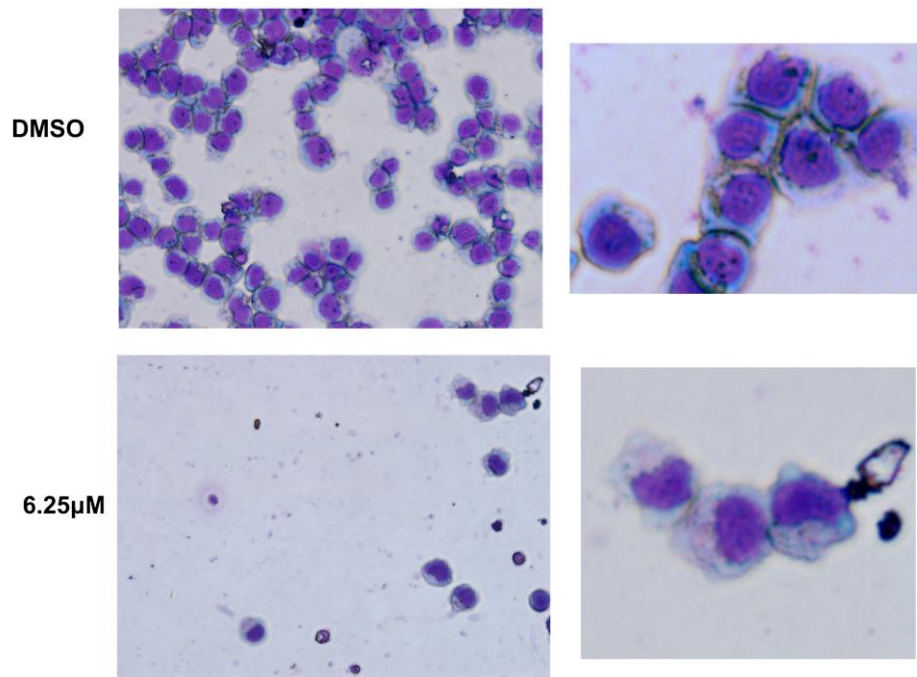

**Supplementary Figure 3. DC\_YM21 treatment induces human MLL leukemia cells KOPN-8 (MLL-ENL) differentiation.** Wright-Giemsa stained cytopins on KOPN-8 cells after 10 days of treatment with DC\_YM21 and DMSO.

## Procedures and Products

All reagents were purchased from commercial sources and used without further purification, unless otherwise indicated.

**Loperamide** and **DC\_YM1~DC\_YM3** are commercially available:

**Loperamide Hydrochloride:** CAS Number: 34552-83-5, Bought from Tokyo Chemical Industry (TCI) Shanghai, Catalogue Number: L0154, Melting Point: 223-225 °C, Purity: > 98%.

**DC\_YM1:** Loperamide *N*-Oxide, CAS Number: 106900-12-3 Bought from TLC PharmaChem, Source Lot Number: 1045-029A3; Melting Point: 169-173 °C, Purity: 97.9%.

**DC\_YM2:** *N*-Desmethyl Loperamide, CAS Number: 66164-07-6, Bought from Toronto Research Chemicals (TRC), Catalogue Number: D291840; Melting Point: 214-216 °C, Purity: 98%.

**DC\_YM3:** *N*-Didesmethyl Loperamide, CAS Number: 66164-06-5, Bought from Toronto Research Chemicals (TRC), Catalogue Number: D441135. Melting Point: 200-203 °C, Purity: 98%.

### 1. Synthesis of 4-(4-(4-chlorophenyl)-4-hydroxypiperidin-1-yl)-2,2-diphenylbutane nitrile (**DC\_YM4**)

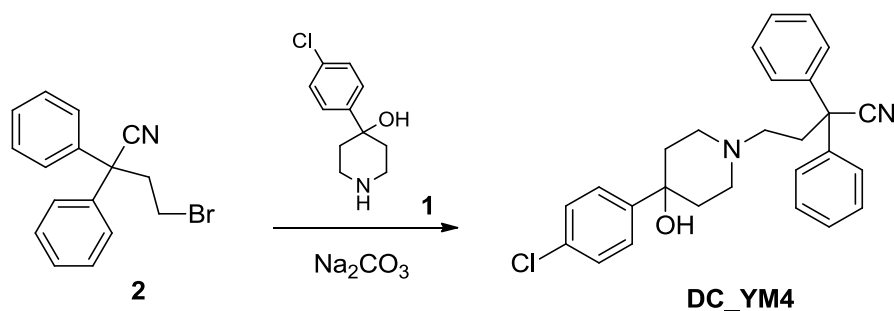

A solution of 4-bromo-2,2-diphenylbutanenitrile (**2**, 299 mg, 1 mmol) in  $\text{CH}_3\text{CN}$  (5 mL) was added 4-(4-chlorophenyl)-4-hydroxypiperidine (**1**, 211 mg, 1 mmol) and



Na<sub>2</sub>CO<sub>3</sub> (318 mg, 3 mmol), and the mixture was stirred at 80 °C for 4 h. Then the solvent was removed in vacuo. The residue was diluted with EtOAc and washed with water. The organic layers were combined, washed with brine, dried over Na<sub>2</sub>SO<sub>4</sub> and concentrated under reduced pressure. The residue was purified by flash column chromatography (dichloromethane/methanol = 20/1) to give compound **DC\_YM4**. Yield, 83%; mp 216 – 218 °C; <sup>1</sup>H NMR (400 MHz, CDCl<sub>3</sub>) δ 7.47-7.30 (m, 14H), 2.83-2.75 (m, 2H), 2.71-2.64 (m, 2H), 2.59-2.52 (m, 2H), 2.51-2.43 (m, 2H), 2.11 (td, *J* = 13.3, 4.4 Hz, 2H), 1.76-1.68 (m, 3H); <sup>13</sup>C NMR (125 MHz, CDCl<sub>3</sub>) δ 146.8, 140.0, 132.8, 129.0, 128.4, 128.0, 126.8, 126.1, 122.1, 71.0, 54.8, 50.1, 49.6, 38.4, 36.6; HRMS (EI) calcd. for C<sub>27</sub>H<sub>27</sub>ClN<sub>2</sub>O [M]<sup>+</sup>: 430.1812. Found: 430.1807.

## 2. Synthesis of 4-(4-chlorophenyl)-1-(3-hydroxy-3,3-diphenylpropyl)piperidin-4-ol (**DC\_YM5**)

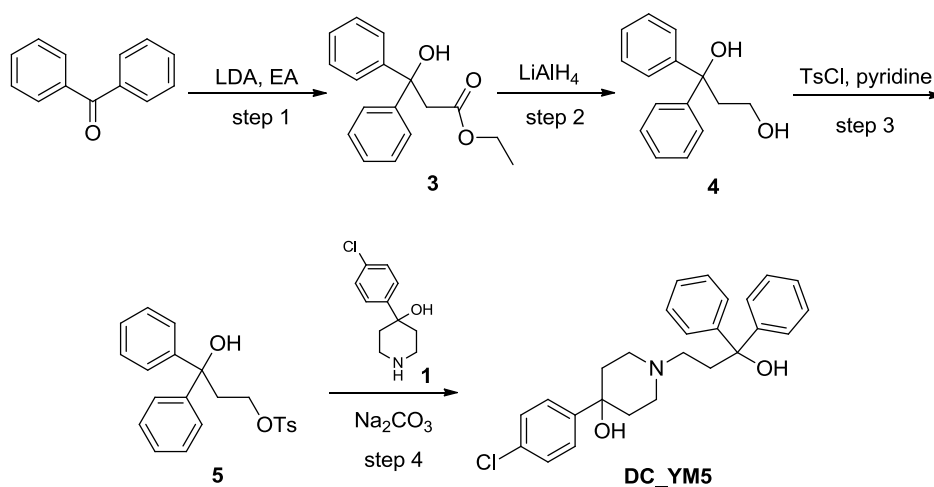

**Step 1:** To a solution of diisopropylamine (0.5 mL) in THF (10 mL) was added *n*-butyllithium solution in hexane (2.2 mL, 1.6 M in hexane) at -78 °C. The mixture was stirred at -78 °C for 15 min to get a LDA solution, then EtOAc (0.34 mL) was slowly added to the reaction mixture at -78 °C. After 20 min, a solution of benzophenone (637 mg, 3.5 mmol) in THF (10 mL) was slowly added to the mixture. The reaction mixture was stirred at -78 °C for 2 h. The reaction was quenched with saturated NH<sub>4</sub>Cl solution and extracted with EtOAc. The combined organic layers

were washed with brine, and dried over  $\text{Na}_2\text{SO}_4$ , and concentrated. The residue was purified by column chromatography with petroleum ether/ethyl acetate (100/1, v/v) to obtain the title compound **3** (95% yield); LRMS (EI)  $m/z$  270  $[\text{M}]^+$ ;  $^1\text{H}$  NMR (300 MHz,  $\text{CDCl}_3$ ):  $\delta$  7.38-7.45 (m, 4H), 7.15-7.35 (m, 6H), 5.10 (s, 1H), 4.02 (q,  $J = 7.20$ , 2H), 3.25 (s, 2H), 1.13 (t,  $J = 7.20$ , 3H).

**Step 2:** To a solution of ester **3** (200 mg, 0.74 mmol) in THF (5 mL) was slowly added the suspension of  $\text{LiAlH}_4$  in dry THF (1 mL, 1M) at 0  $^\circ\text{C}$ , and the mixture was stirred at 0  $^\circ\text{C}$  for 1h . After complete consumption of the starting material, the mixture was quenched with water and extracted with ethyl acetate. The combined organic layers was washed with brine, dried over anhydrous  $\text{Na}_2\text{SO}_4$  and concentrated under vacuum to afford the crude product, which was purified by flash column chromatography with petroleum ether/ethyl acetate (3/1, v/v) to give compound **4** (90% yield); LRMS (EI)  $m/z$  228  $[\text{M}]^+$ ;  $^1\text{H}$  NMR (400 MHz,  $\text{CDCl}_3$ )  $\delta$  7.46 – 7.42 (m, 4H), 7.37 – 7.31 (m, 4H), 7.28 – 7.23 (m, 2H), 4.23 (s, 1H), 3.74 (dd,  $J = 9.8, 4.9$  Hz, 2H), 2.66 (t,  $J = 4.3$  Hz, 1H), 2.59 – 2.53 (m, 2H).

**Step 3:** The *p*-toluenesulfonyl chloride (125 mg, 0.66 mmol) was added to the solution of the diol **4** (100 mg, 0.44 mmol) in dry pyridine (3 mL) at 0  $^\circ\text{C}$  under atmosphere of argon, and the mixture was stirred at 0  $^\circ\text{C}$  for 4 h. The mixture was diluted with EtOAc and washed with hydrochloric acid (2 M), the combined organic layers were washed with brine, and dried over  $\text{Na}_2\text{SO}_4$ , and concentrated. The residue was purified by column chromatography with petroleum ether/ethyl acetate (6/1, v/v) to obtain the compound **5** (72%); LRMS (EI)  $m/z$  382  $[\text{M}]^+$ ;  $^1\text{H}$  NMR (300 MHz,  $\text{CDCl}_3$ )  $\delta$  7.68 (d,  $J = 8.1$  Hz, 2H), 7.33 – 7.21 (m, 12H), 4.09 (t,  $J = 7.3$  Hz, 2H), 2.71 (t,  $J = 7.3$  Hz, 2H), 2.44 (s, 3H).

**Step 4:** A solution of tosylate **5** (382 mg, 1 mmol) in  $\text{CH}_3\text{CN}$  (5 mL) was added 4-(4-chlorophenyl)-4-hydroxypiperidine (211 mg, 1 mmol) and  $\text{Na}_2\text{CO}_3$  (318 mg, 3 mmol), and the mixture was stirred at 80  $^\circ\text{C}$  for 4 h. Then the solvent was removed in

vacuo. The residue was diluted with EtOAc and washed with water. The organic layers were combined, washed with brine, dried over Na<sub>2</sub>SO<sub>4</sub> and concentrated under reduced pressure. The residue was purified by flash column chromatography (dichloromethane/methanol = 20/1) to give compound **DC\_YM5**. Yield, 80%; mp 230 – 232 °C; <sup>1</sup>H NMR (400 MHz, CDCl<sub>3</sub>) δ 8.34 (brs, 1H), 7.50-7.45 (m, 4H), 7.45-7.40 (m, 2H), 7.35-7.28 (m, 6H), 7.20 (t, *J* = 7.3 Hz, 2H), 2.83 (d, *J* = 11.4 Hz, 2H), 2.58-2.40 (m, 6H), 2.13 (td, *J* = 13.4, 4.0 Hz, 2H), 1.74 (d, *J* = 12.6 Hz, 2H), 1.57 (s, 1H); <sup>13</sup>C NMR (100 MHz, CDCl<sub>3</sub>) δ 147.9, 146.4, 133.0, 128.5, 128.1, 126.5, 126.1, 125.8, 79.1, 70.9, 55.0, 49.3, 38.5, 35.3; HRMS (EI) calcd. for C<sub>26</sub>H<sub>28</sub>ClNO<sub>2</sub> [M]<sup>+</sup>: 421.1809. Found: 421.1811.

### 3. Synthesis of 4-(4-(4-chlorophenyl)-3,6-dihydropyridin-1(2H)-yl)-*N,N*-dimethyl-2,2-diphenylbutanamide (**DC\_YM6**)

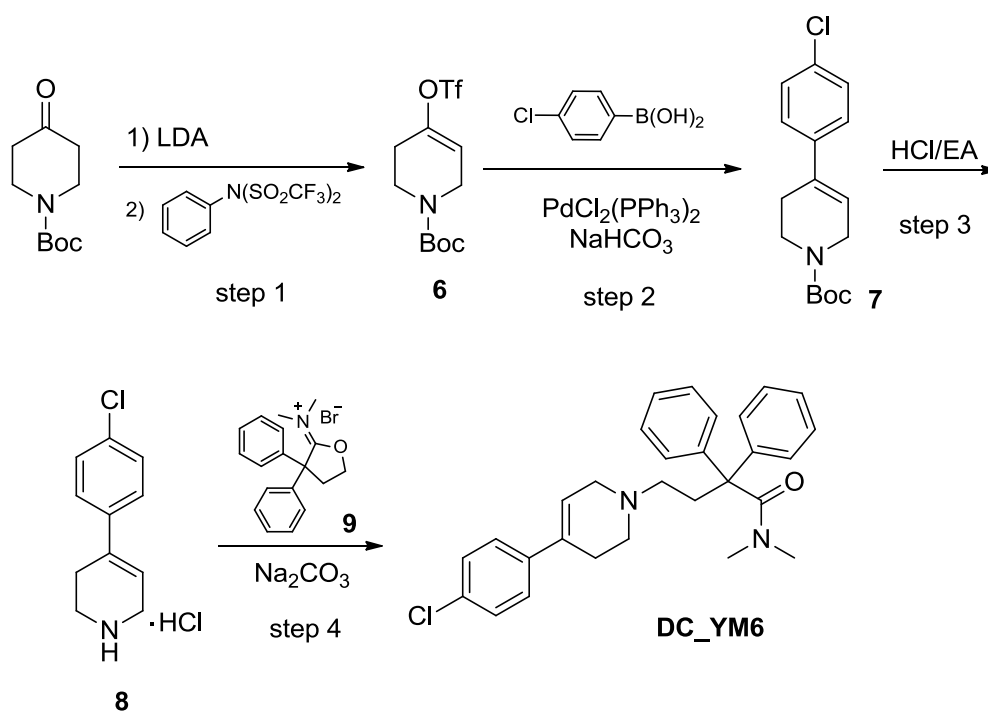

**Step 1:** To a solution of diisopropylamine (0.7 mL) in THF (10 mL) was added n-butyllithium solution in hexane (3.1 mL, 1.6 M in hexane) at -78 °C. The mixture was stirred at -78 °C for 15 min to get a LDA solution, then 1-Boc-4-piperidone (1.0 g,

5.02 mmol) in THF (10 mL) was slowly added to the reaction mixture at -78 °C. After 20 min, a solution of 1,1,1-trifluoro-*N*-phenyl-*N*-(trifluoromethylsulfonyl)methane sulfonamide (1.8 g, 5.02 mmol) in THF (10 mL) was slowly added to the mixture. The reaction mixture was stirred at 0 °C for 3 h. The reaction was quenched with saturated NH<sub>4</sub>Cl solution and extracted with EtOAc. The combined organic layers were washed with brine, and dried over Na<sub>2</sub>SO<sub>4</sub>, and concentrated. The residue was purified by column chromatography with petroleum ether/ethyl acetate (10/1, v/v) to obtain the compound **6** (92% yield); LRMS (EI) *m/z* 331 [M]<sup>+</sup>; <sup>1</sup>H NMR (300 MHz, CDCl<sub>3</sub>) δ 5.80-5.72 (m, 1H), 4.06-4.02 (m, 2H), 3.63 (t, *J* = 5.6 Hz, 2H), 2.48-2.40 (m, 2H), 1.47 (s, 9H).

**Step 2:** To a solution of enol triflate **6** (331 mg, 1 mmol) in THF (4 mL) were added 4-chlorobenzeneboronic acid (187 mg, 1.2 mmol), saturated NaHCO<sub>3</sub> solution (1 mL) and PdCl<sub>2</sub>(PPh<sub>3</sub>)<sub>2</sub> (14 mg, 0.02 mmol), and the mixture was stirred at reflux for 2 h. The mixture was diluted with EtOAc and the aqueous layer was separated and extracted with EtOAc. The organic layers were combined, washed with brine, dried over Na<sub>2</sub>SO<sub>4</sub> and concentrated under reduced pressure. The residue was purified by flash column chromatography (petroleum ether/ethyl acetate = 2/1) to give compound **7** (95%); LRMS (EI) *m/z* 293 [M]<sup>+</sup>; <sup>1</sup>H NMR (400 MHz, CDCl<sub>3</sub>) δ 7.34-7.27 (m, 4H), 6.01 (brs, 1H), 4.06 (brs, 2H), 3.63 (brs, 2H), 2.47 (brs, 2H), 1.48 (s, 9H).

**Step 3:** A round-bottom flask was placed a solution of compound **7** (293 mg, 1 mmol) in ethyl acetate (5 mL), hydrogen chloride (gas) was bubbled through the solution and the resulting mixture was stirred for 1 h at room temperature. The formed precipitate was collected by filtration and dried to yield 206 mg (90%) of a white solid **8**; LRMS (EI) *m/z* 229 [M]<sup>+</sup>.

**Step 4:** A solution of compound **8** (55 mg, 0.24 mmol) in CH<sub>3</sub>CN (5 mL) was added dihydro-*N,N*-dimethyl-3,3-diphenyl-2(3H)-furaniminium bromide (**9**, 65 mg, 0.19 mmol) and Na<sub>2</sub>CO<sub>3</sub> (60 mg, 0.57 mmol), and the mixture was stirred at 80 °C for 4h.

Then the solvent was removed in vacuo. The residue was diluted with EtOAc and washed with water. The organic layers were combined, washed with brine, dried over Na<sub>2</sub>SO<sub>4</sub> and concentrated under reduced pressure. The residue was purified by flash column chromatography (dichloromethane/methanol = 20/1) to give compound **DC\_YM6**. Yield, 80%; mp 130 – 132 °C; <sup>1</sup>H NMR (300 MHz, CDCl<sub>3</sub>) δ 7.45-7.33 (m, 8H), 7.31-7.22 (m, 6H), 5.96-5.91 (m, 1H), 3.18-3.11 (m, 2H), 2.98 (brs, 3H), 2.69 (t, *J* = 5.6 Hz, 2H), 2.60-2.46 (m, 4H), 2.33 (brs, 3H), 2.32-2.21 (m, 2H); <sup>13</sup>C NMR (100 MHz, CDCl<sub>3</sub>) δ 173.4, 140.7, 139.3, 133.7, 132.4, 128.3, 128.2, 128.0, 126.7, 126.1, 122.7, 59.7, 55.4, 53.1, 50.2, 42.6, 39.1, 37.2, 28.0; HRMS (EI) calcd. for C<sub>29</sub>H<sub>31</sub>ClN<sub>2</sub>O [M]<sup>+</sup>: 458.2125. Found: 458.2122.

#### 4. Synthesis of 4-(4-(4-chlorophenyl)piperazin-1-yl)-*N,N*-dimethyl-2,2-diphenylbutanamide (**DC\_YM7**)

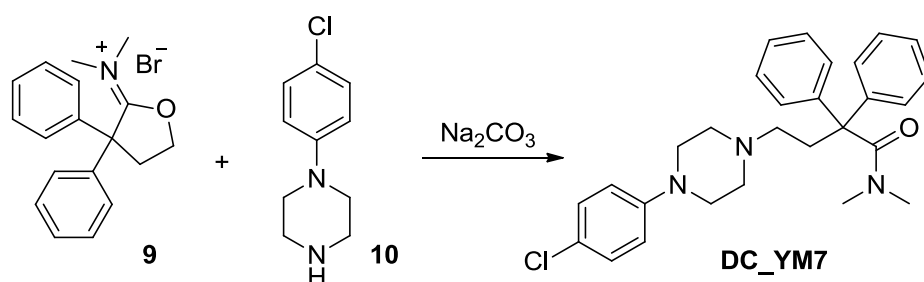

A solution of compound **9** (50 mg, 0.14 mmol) in CH<sub>3</sub>CN (5 mL) was added 1-(4-chlorophenyl)piperazine (**10**) (43 mg, 0.22 mmol) and Na<sub>2</sub>CO<sub>3</sub> (46 mg, 0.43 mmol), and the mixture was stirred at 80 °C for 4 h. Then the solvent was removed in vacuo. The residue was diluted with EtOAc and washed with water. The organic layers were combined, washed with brine, dried over Na<sub>2</sub>SO<sub>4</sub> and concentrated under reduced pressure. The residue was purified by flash column chromatography (dichloromethane/methanol = 20/1) to give compound **DC\_YM7**. Yield, 82%; mp 172 – 174 °C; <sup>1</sup>H NMR (400 MHz, CDCl<sub>3</sub>) δ 7.46-7.36 (m, 8H), 7.33-7.28 (m, 2H), 7.20-7.15 (m, 2H), 6.82-6.77 (m, 2H), 3.12-3.06 (m, 4H), 3.01 (brs, 3H), 2.57-2.45 (m, 6H), 2.35 (brs, 3H), 2.17-2.10 (m, 2H); <sup>13</sup>C NMR (125 MHz, CDCl<sub>3</sub>) δ 173.5, 150.0,

140.7, 128.8, 128.4, 128.1, 126.8, 124.1, 117.0, 59.7, 55.8, 53.0, 49.0, 42.5, 39.2, 37.2;  
HRMS (EI) calcd. for C<sub>28</sub>H<sub>32</sub>ClN<sub>3</sub>O [M]<sup>+</sup>: 461.2234. Found: 461.2231.

5. Synthesis of 4-(4-(4-chlorophenyl)-3,6-dihydropyridin-1(2H)-yl)-*N,N*-diethyl-2,2-diphenylbutanamide (**DC\_YM8**)

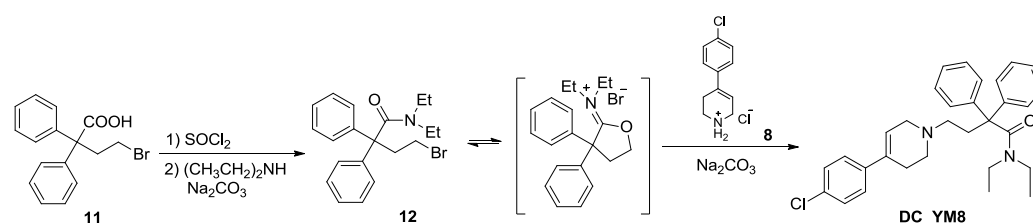

**Step 1:** To a solution of 4-bromo-2,2-diphenylbutyric acid (**11**, 2 g, 6.3 mmol) in CHCl<sub>3</sub> (15 mL) was added SOCl<sub>2</sub> (2 mL) dropwise. The mixture was refluxed for 4 h and allowed to cool, and the solvent was removed in vacuo. The crude acid chloride was used without purification. To a solution of diethylamine (0.77 mL) and Na<sub>2</sub>CO<sub>3</sub> (1.6 g, 15 mmol) in H<sub>2</sub>O (10 mL) was added dropwise a solution of 4-bromo-2,2-diphenylbutyryl chloride in PhMe (7 mL), while the temperature was kept between 0 and 5 °C. The mixture was stirred for an additional 2 h and extracted with CHCl<sub>3</sub>. The organic layer was dried over Na<sub>2</sub>SO<sub>4</sub> and the solvent removed in vacuo. The crude compound **12** was used in the next step without purification.

**Step 2:** A solution of compound **12** (373 mg, 1 mmol) in CH<sub>3</sub>CN (5 mL) was added compound **8** (229 mg, 1 mmol) and Na<sub>2</sub>CO<sub>3</sub> (318 mg, 3 mmol), and the mixture was stirred at 80 °C for 4 h. Then the solvent was removed in vacuo. The residue was diluted with EtOAc and washed with water. The organic layers were combined, washed with brine, dried over Na<sub>2</sub>SO<sub>4</sub> and concentrated under reduced pressure. The residue was purified by flash column chromatography (dichloromethane/methanol = 20/1) to give compound **DC\_YM8**. Yield, 70%; mp 165 – 167 °C; <sup>1</sup>H NMR (300 MHz, CDCl<sub>3</sub>) δ 7.43-7.33 (m, 8H), 7.31-7.22 (m, 6H), 5.91 (s, 1H), 3.42-3.24 (m, 4H), 2.90-2.78 (m, 4H), 2.65-2.51 (m, 4H), 2.44-2.33 (m, 2H), 1.18 (t, *J* = 7.0 Hz, 3H),

-0.01 (t,  $J = 6.9$  Hz, 3H);  $^{13}\text{C}$  NMR (125 MHz,  $\text{CDCl}_3$ )  $\delta$  172.5, 140.4, 138.5, 134.2, 133.1, 128.6, 128.4, 128.2, 127.0, 126.3, 59.6, 55.0, 53.5, 52.1, 49.7, 43.6, 40.7, 12.3, 11.2; HRMS (EI) calcd. for  $\text{C}_{31}\text{H}_{35}\text{ClN}_2\text{O}$   $[\text{M}]^+$  : 486.2438. Found: 486.2433.

## 6. Synthesis of 4-(4-(4-chlorophenyl)-3,6-dihydropyridin-1(2H)-yl)-2,2-diphenylbutan-1-amine (**DC\_YM9**)

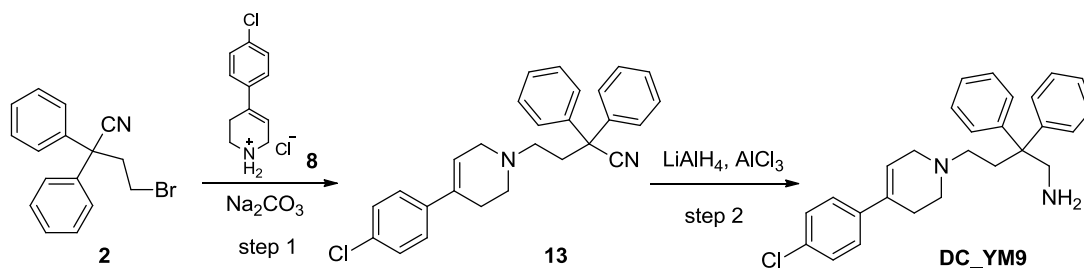

**Step 1:** A solution of 4-bromo-2,2-diphenylbutanenitrile (**2**, 299 mg, 1 mmol) in  $\text{CH}_3\text{CN}$  (5 mL) was added compound **8** (229 mg, 1 mmol) and  $\text{Na}_2\text{CO}_3$  (318 mg, 3 mmol), and the mixture was stirred at 80 °C for 4 h. Then the solvent was removed in vacuo. The residue was diluted with EtOAc and washed with water. The organic layers were combined, washed with brine, dried over  $\text{Na}_2\text{SO}_4$  and concentrated under reduced pressure. The residue was purified by flash column chromatography (petroleum ether/ethyl acetate = 2/1) to give compound **13** (80%); LRMS (EI)  $m/z$  412  $[\text{M}]^+$ ;  $^1\text{H}$  NMR (300 MHz,  $\text{CDCl}_3$ )  $\delta$  7.51-7.23 (m, 14H), 6.03 (s, 1H), 3.16 (d,  $J = 3.1$  Hz, 2H), 2.76-2.66 (m, 4H), 2.64-2.48 (s, 1H).

**Step 2:** LAH (0.15 mL, 2.4 M in THF) was slurried in anhydrous THF (5 mL), and the solution was cooled in an ice bath to 0 °C under nitrogen.  $\text{AlCl}_3$  (49 mg, 0.37 mmol) was dissolved in anhydrous THF (5mL). The  $\text{AlCl}_3$  solution was added to the LAH slurry via an addition funnel over 15 min. Compound **12** (52 mg, 0.13 mmol) was dissolved in anhydrous THF (5 mL). This solution was added to the LAH/ $\text{AlCl}_3$  mixture slowly. The resulting mixture was stirred at ambient temperature for 1 h and then heated to reflux for 7 h. When cooled to 0 °C the reaction was quenched with water and extracted with  $\text{Et}_2\text{O}$ . The combined organic layers were washed with brine,

and dried over  $\text{Na}_2\text{SO}_4$ , and concentrated. The residue was purified by column chromatography with dichloromethane/methanol (30/1, v/v) to obtain the compound **DC\_YM9**. Yield, 60%; mp 147 – 149 °C;  $^1\text{H}$  NMR (300 MHz,  $\text{CDCl}_3$ )  $\delta$  7.33-7.17 (m, 14H), 6.00 (s, 1H), 3.35 (s, 2H), 3.10-3.03 (m, 2H), 2.61 (t,  $J = 5.4$  Hz, 2H), 2.53-2.39 (m, 4H), 2.23-2.14 (m, 2H);  $^{13}\text{C}$  NMR (125 MHz,  $\text{CDCl}_3$ )  $\delta$  146.3, 139.2, 134.0, 132.7, 128.4, 128.2, 128.1, 126.2, 122.3, 53.9, 53.4, 51.0, 50.6, 49.1, 33.5, 28.1; HRMS (EI) calcd. for  $\text{C}_{27}\text{H}_{29}\text{ClN}_2$   $[\text{M}]^+$  : 416.2019. Found: 416.2011.

7. **DC\_YM10 to DC\_YM20** were synthesized according to the procedure for synthesis of **DC\_YM6** using various of 4-aryl substituted-1,2,3,6-tetrahydropyridine (**14**)

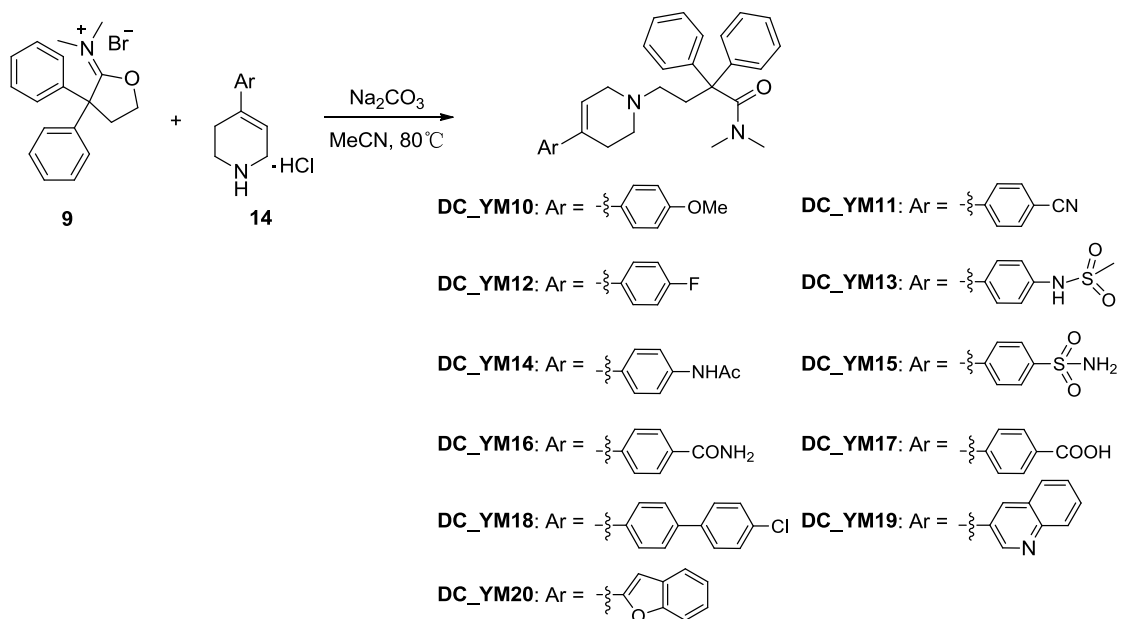



8. General procedure for the synthesis of **DC\_YM21** to **DC\_YM27** (taking **DC\_YM21** as an example):

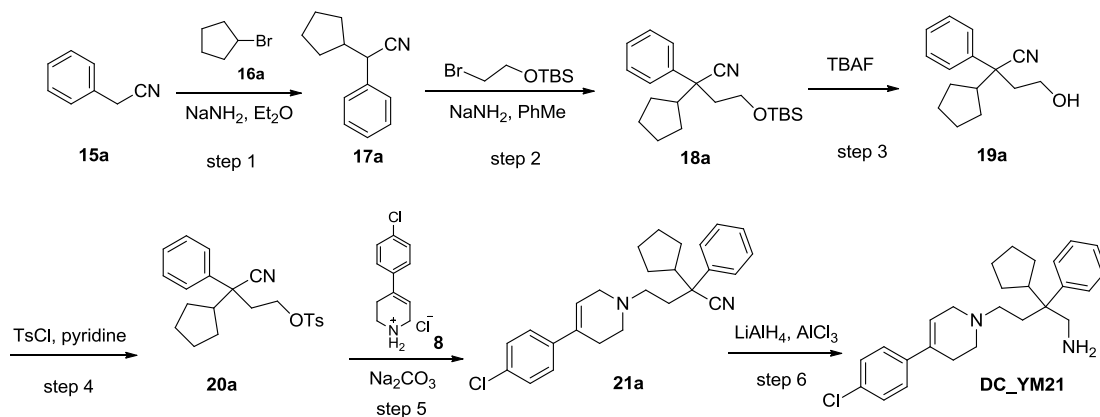

**Step 1:** A solution of 2-phenylacetonitrile (**15a**, 3 g, 25 mmol) in Et<sub>2</sub>O (50 mL) was added bromocyclopentane (**16a** 2.7 mL) and NaNH<sub>2</sub> (1 g, 25 mmol), the mixture was refluxed for 3 h then quenched with water and extracted with EtOAc. The combined organic layers were washed with brine, and dried over Na<sub>2</sub>SO<sub>4</sub>, and concentrated. The residue was purified by column chromatography with petroleum ether/ethyl acetate (30/1, v/v) to obtain the compound **17a** (90% yield).

**Step 2:** To a solution of compound **17a** (253 mg, 1.4 mmol) in PhMe (10 mL) was added 2-(tert-butyldimethylsilyloxy)ethyl bromide (327 g, 1.4 mmol) and NaNH<sub>2</sub> (164 mg, 4.2 mmol), the mixture was stirred at 120 °C for 3 h then quenched with water and extracted with EtOAc. The combined organic layers were washed with brine, and dried over Na<sub>2</sub>SO<sub>4</sub>, and concentrated. The residue was purified by column chromatography with petroleum ether/ethyl acetate (30/1, v/v) to obtain the compound **18a** (85% yield)

**Step 3:** To a stirred solution of compound **18a** (343 mg, 1 mmol) in THF (5 mL) was added tetrabutylammonium fluoride (1 mL, 1M in THF), the reaction was stirred at room temperature for 2 h. The mixture was diluted with EtOAc and washed with water. The organic layers were combined, washed with brine, dried over Na<sub>2</sub>SO<sub>4</sub> and

concentrated under reduced pressure. The residue was purified by flash column chromatography (petroleum ether /acetone = 2/1) to give compound **19a** (90%).

**Step 4:** The *p*-toluenesulfonyl chloride (191 mg, 1mmol) was added to the solution of the compound **19a** (206 mg, 0.9mmol) in dry pyridine (5mL) at 0 °C under atmosphere of argon, and the mixture was stirred at 0 °C for 4 h. The mixture was diluted with EtOAc and washed with hydrochloric acid (2 M), the combined organic layers were washed with brine, and dried over Na<sub>2</sub>SO<sub>4</sub>, and concentrated. The residue was purified by column chromatography with petroleum ether/ethyl acetate (6/1, v/v) to obtain the compound **20a** (85% yield).

**Step 5:** A solution of compound **20a** (383 mg, 1mmol) in CH<sub>3</sub>CN (5mL) was added compound **8** (229 mg, 1mmol) and Na<sub>2</sub>CO<sub>3</sub> (318 mg, 3mmol), and the mixture was stirred at 80 °C for 4 h. Then the solvent was removed in vacuo. The residue was diluted with EtOAc and washed with water. The organic layers were combined, washed with brine, dried over Na<sub>2</sub>SO<sub>4</sub> and concentrated under reduced pressure. The residue was purified by flash column chromatography (petroleum ether /acetone = 3/1) to give compound **21a** (70%).

**Step 6:** LAH (0.15 mL, 2.4 M in THF) was slurried in anhydrous THF (5 mL), and the solution was cooled in an ice bath to 0 °C under nitrogen. AlCl<sub>3</sub> (49 mg, 0.37 mmol) was dissolved in anhydrous THF (5 mL). The AlCl<sub>3</sub> solution was added to the LAH slurry via an addition funnel over 15 min. Compound **21a** (50 mg, 0.12 mmol) was dissolved in anhydrous THF (5mL). This solution was added to the LAH/AlCl<sub>3</sub> mixture slowly. The resulting mixture was stirred at ambient temperature for 1 h and then heated to reflux for 7 h. When cooled to 0 °C the reaction was quenched with water and extracted with Et<sub>2</sub>O. The combined organic layers were washed with brine, and dried over Na<sub>2</sub>SO<sub>4</sub>, and concentrated. The residue was purified by column chromatography with dichloromethane/methanol (15/1, v/v) to obtain the compound **DC\_YM21** (53%).

**Supplementary Table 3. HPLC analysis data of synthesized compounds**

| Compound | Retention Time (min, $t_R$ ) | Relative Purity (%) |
|----------|------------------------------|---------------------|
| DC_YM4   | 11.892                       | 96.12               |
| DC_YM5   | 9.786                        | 97.39               |
| DC_YM6   | 11.370                       | 95.54               |
| DC_YM7   | 10.669                       | 97.10               |
| DC_YM8   | 11.731                       | 95.34               |
| DC_YM9   | 11.412                       | 95.13               |
| DC_YM10  | 10.677                       | 95.08               |
| DC_YM11  | 9.263                        | 95.21               |
| DC_YM12  | 10.333                       | 96.42               |
| DC_YM13  | 8.532                        | 95.55               |
| DC_YM14  | 9.711                        | 95.91               |
| DC_YM15  | 8.372                        | 97.14               |
| DC_YM16  | 8.018                        | 95.17               |
| DC_YM17  | 6.322                        | 96.59               |
| DC_YM18  | 13.347                       | 97.23               |
| DC_YM19  | 10.091                       | 96.02               |
| DC_YM20  | 11.827                       | 95.31               |
| DC_YM21  | 12.213                       | 96.43               |
| DC_YM22  | 11.907                       | 95.32               |
| DC_YM23  | 11.814                       | 95.07               |
| DC_YM24  | 11.942                       | 96.06               |
| DC_YM25  | 11.461                       | 95.08               |
| DC_YM26  | 9.361                        | 96.11               |
| DC_YM27  | 9.725                        | 95.04               |

Mobile phase: MeOH (NH<sub>3</sub>.H<sub>2</sub>O 0.5‰)/H<sub>2</sub>O (NH<sub>3</sub>.H<sub>2</sub>O 0.5‰) with gradient elution (0 ~ 5 min: 50% MeOH (NH<sub>3</sub>.H<sub>2</sub>O 0.5‰) ~ 95% MeOH (NH<sub>3</sub>.H<sub>2</sub>O 0.5‰); 5 ~ 15 min: 95% MeOH (NH<sub>3</sub>.H<sub>2</sub>O 0.5‰)) at 20 °C.

# $^1\text{H}$ and $^{13}\text{C}$ NMR spectra

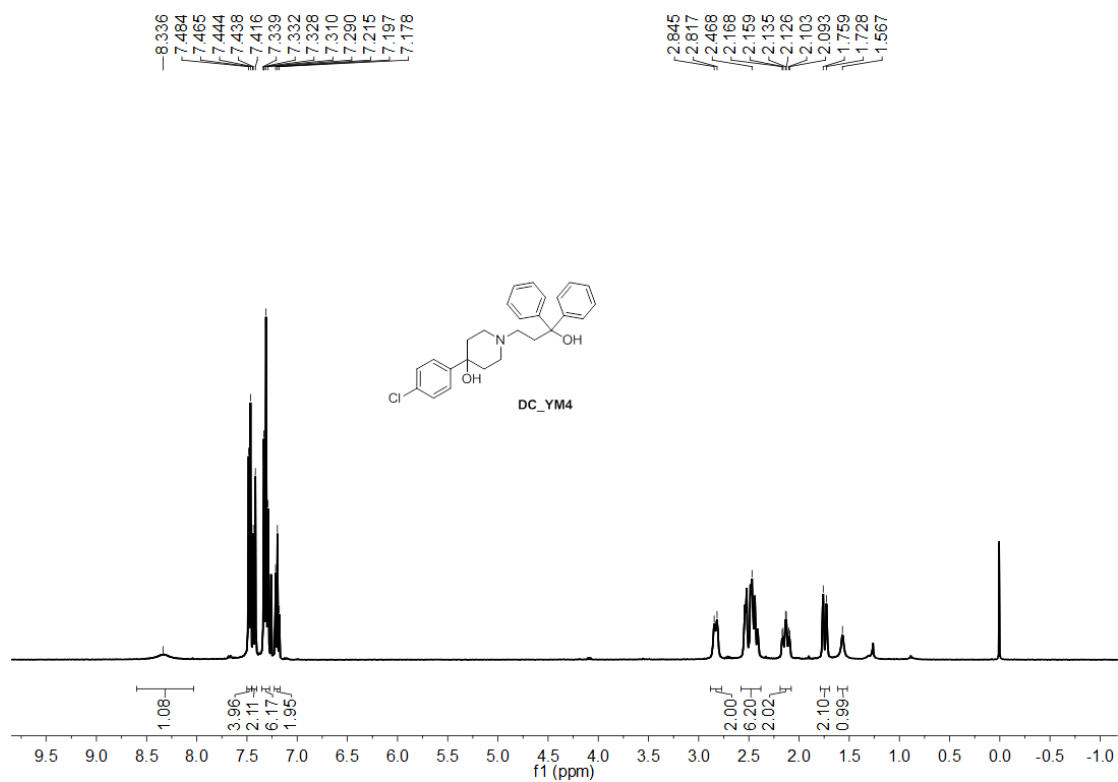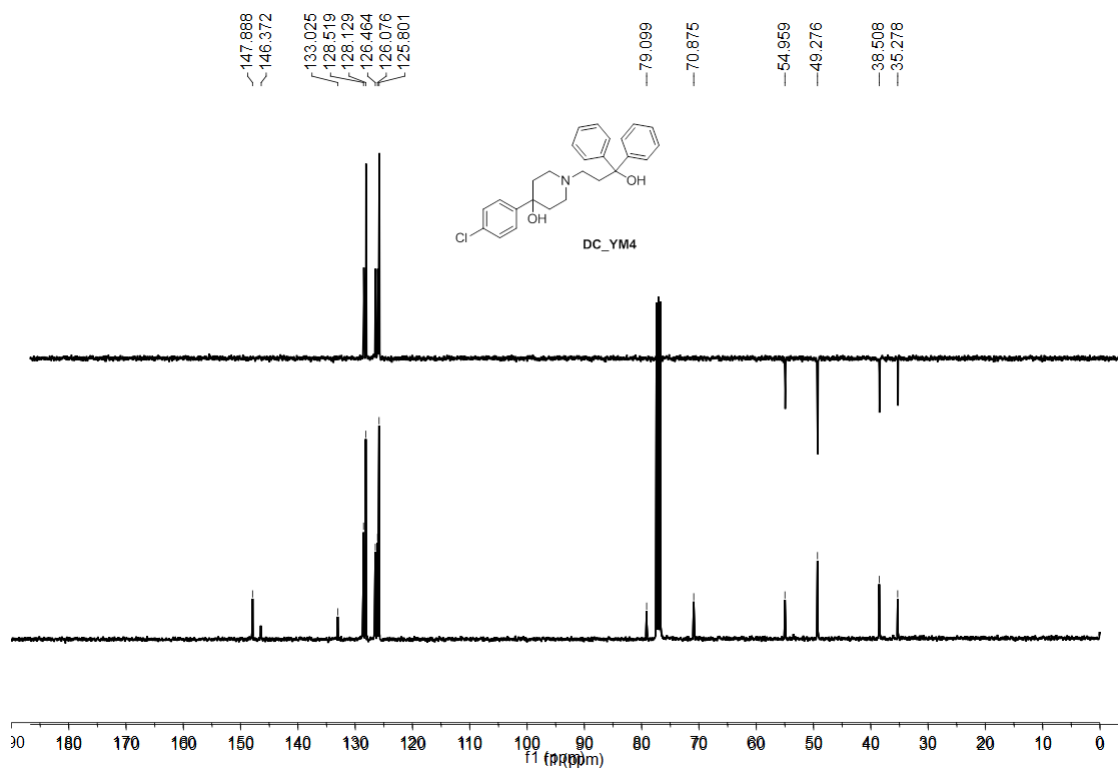

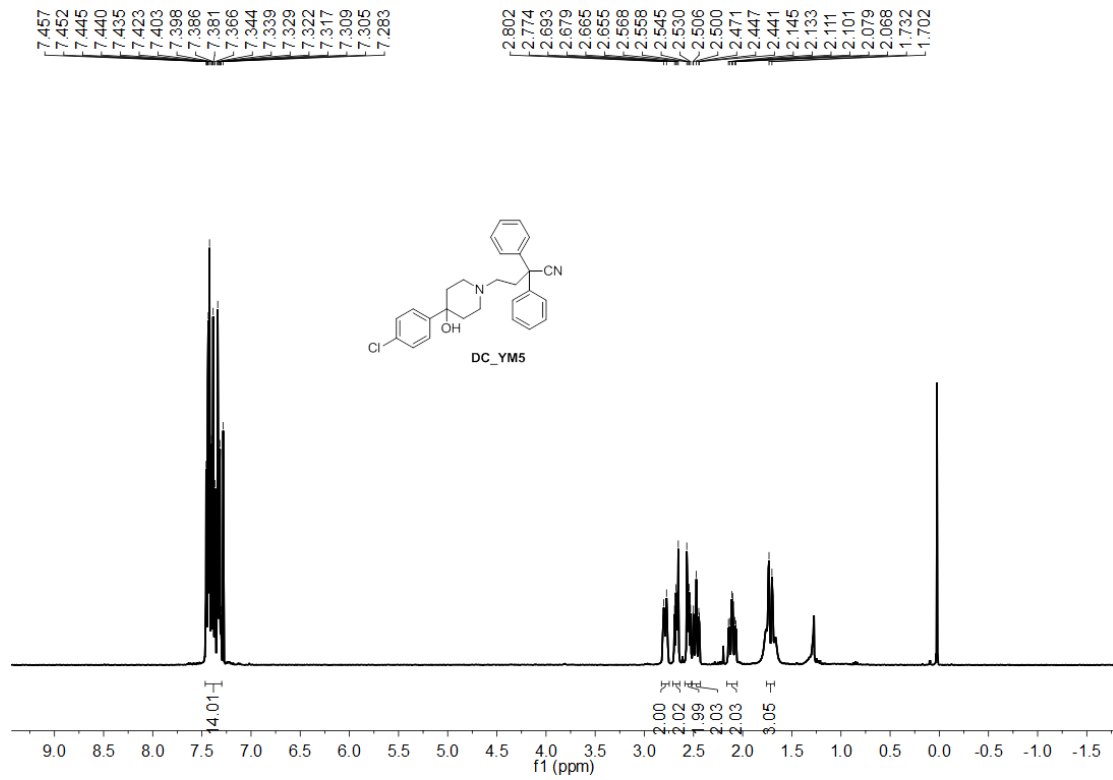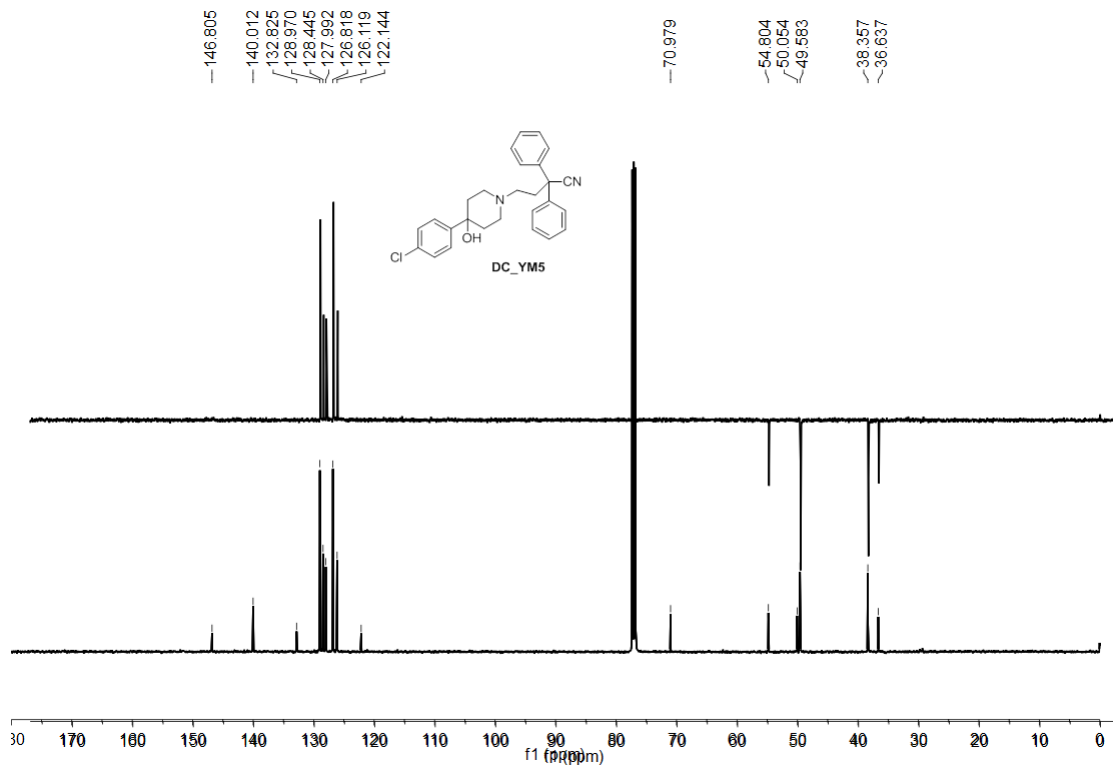

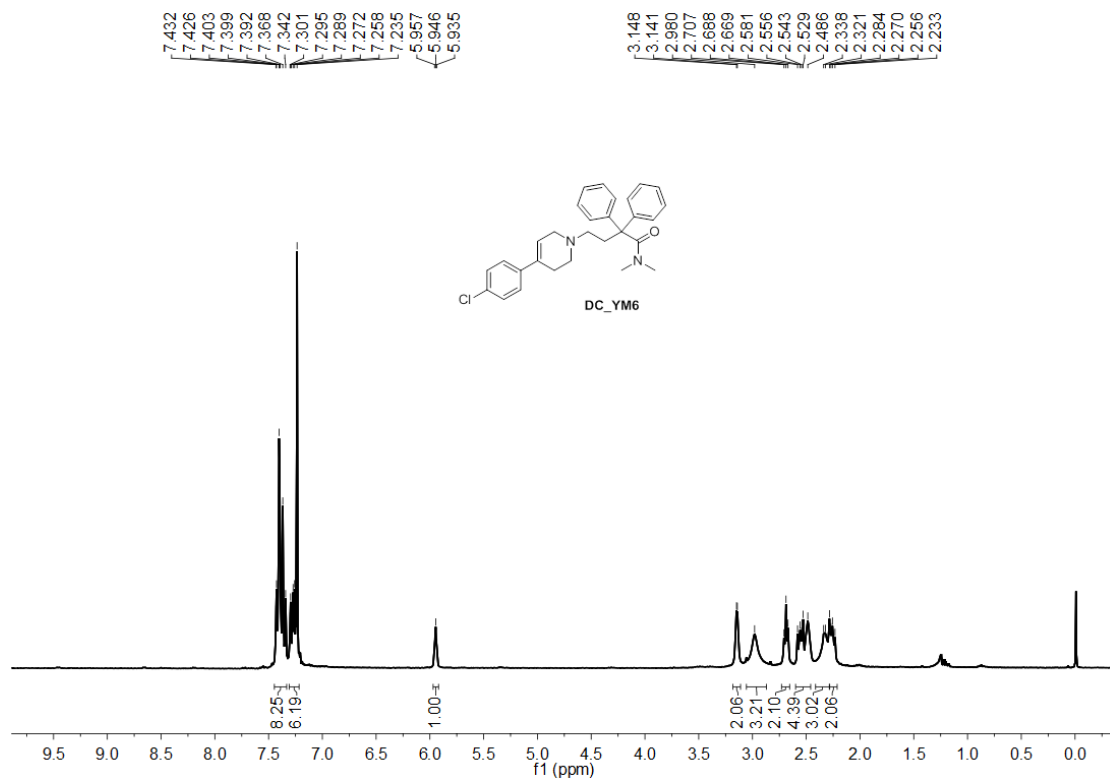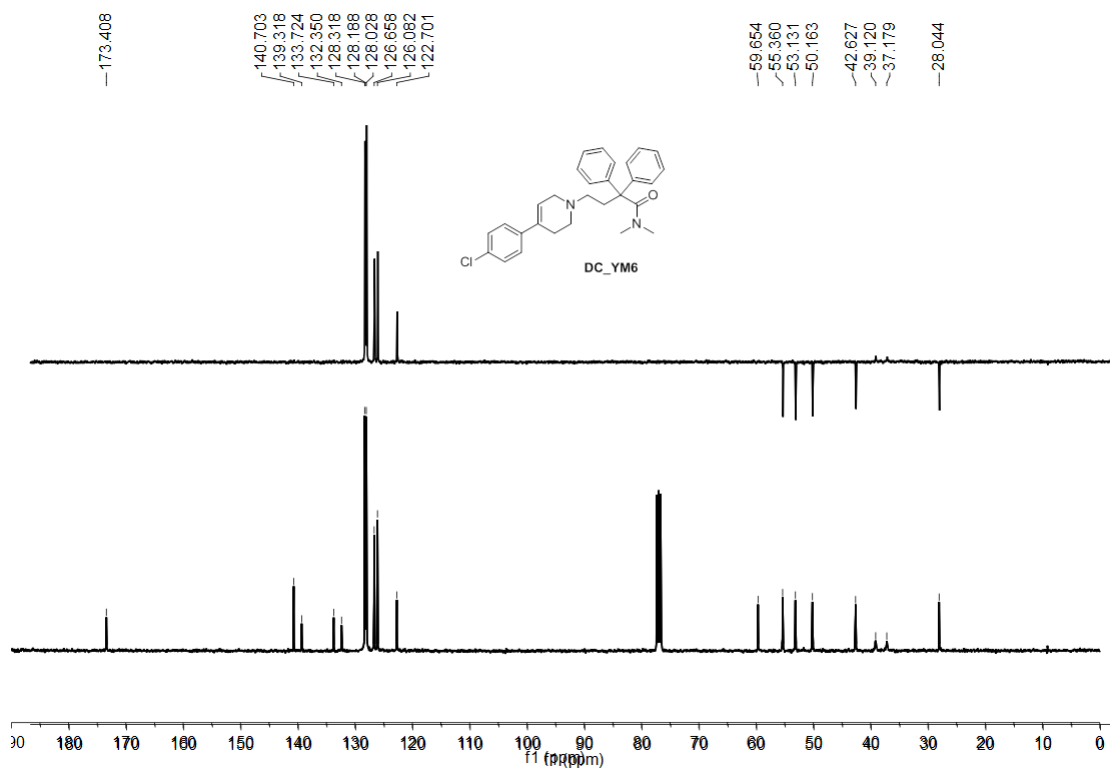

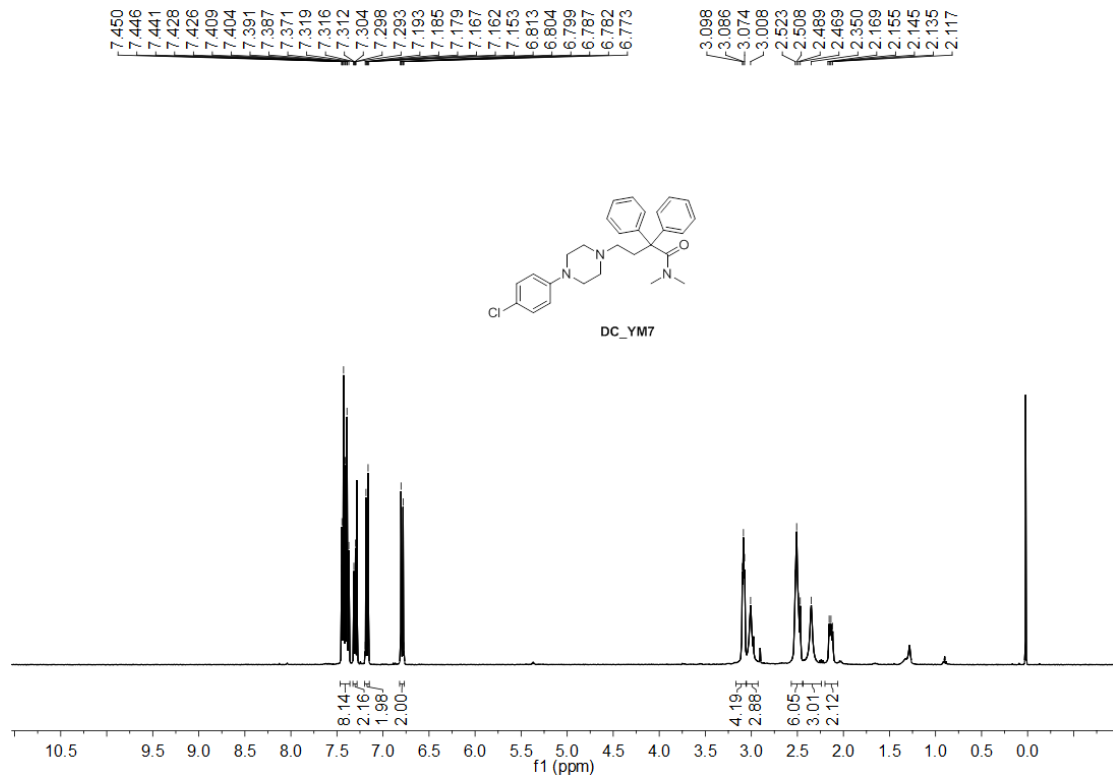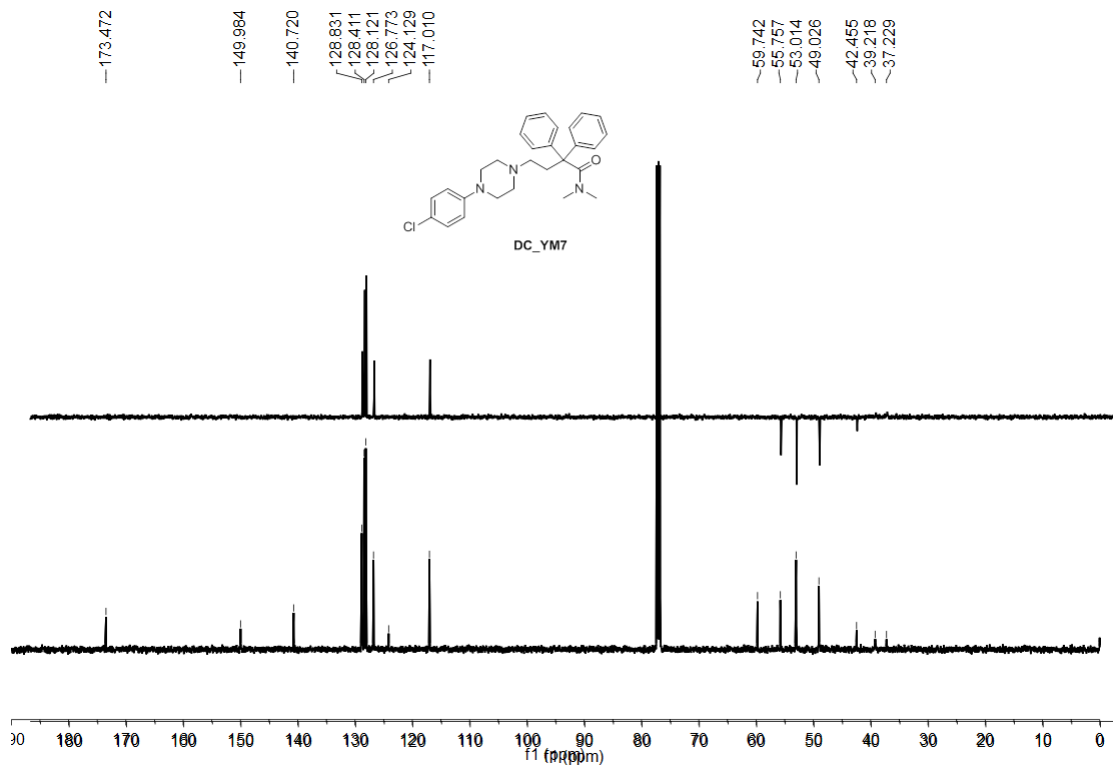

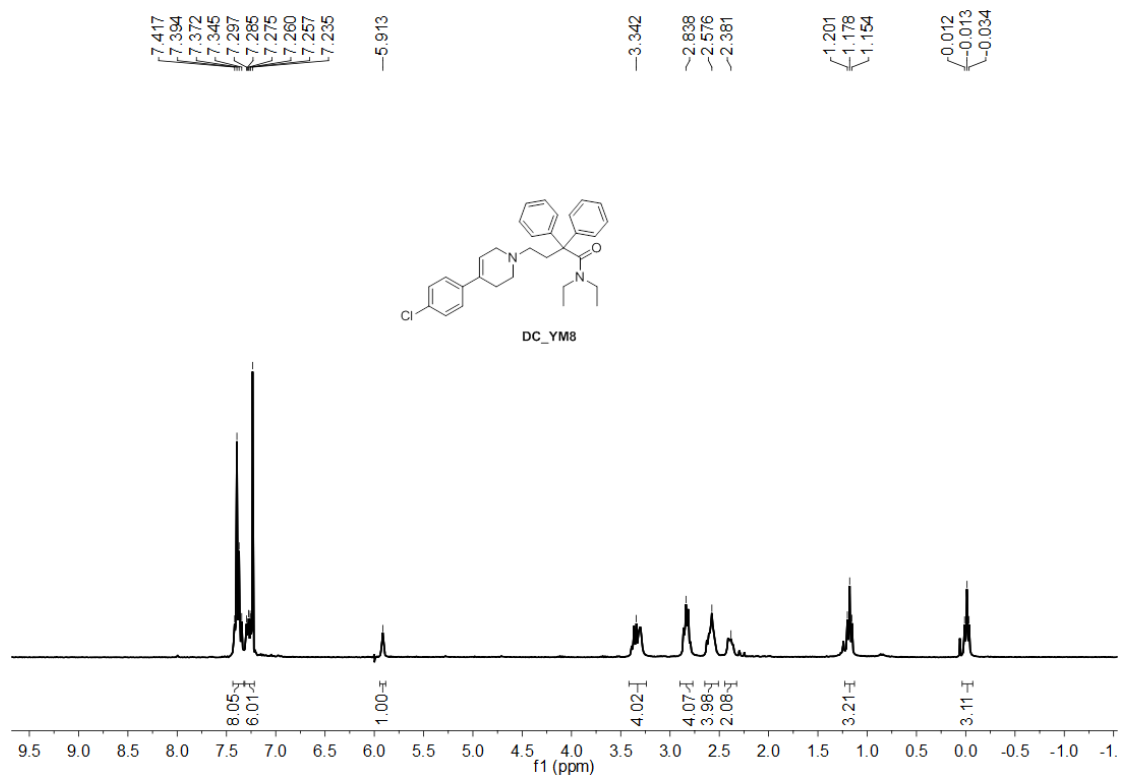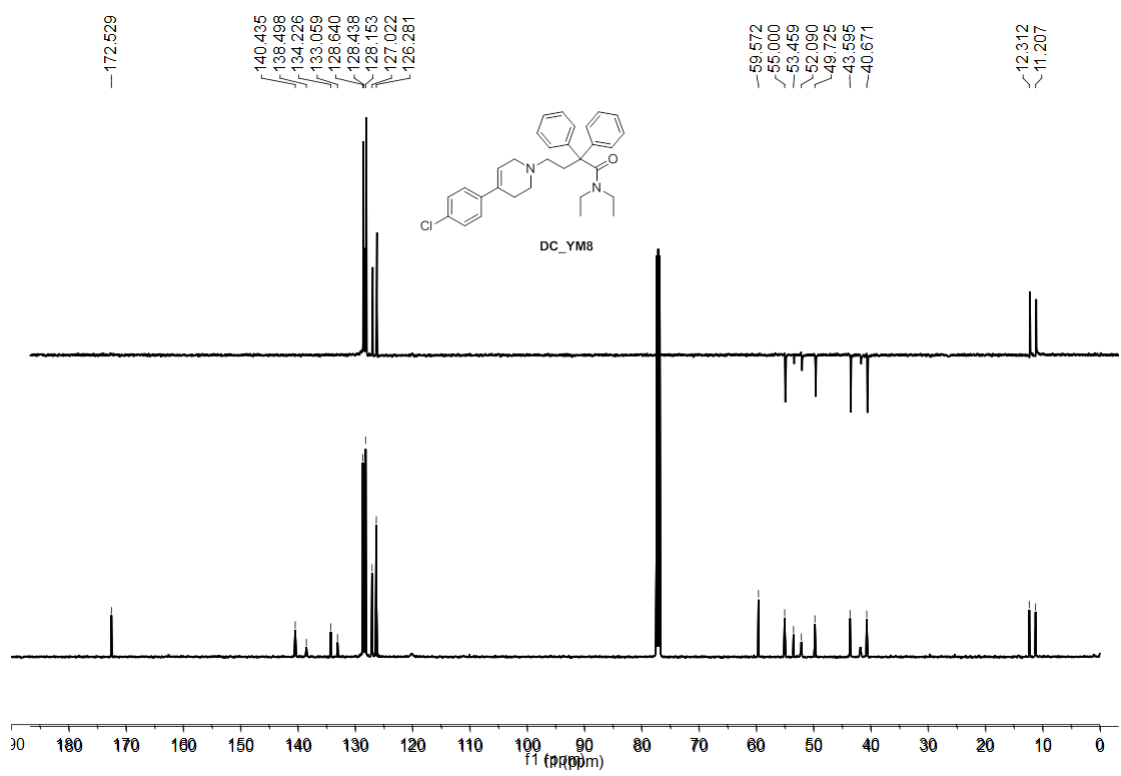



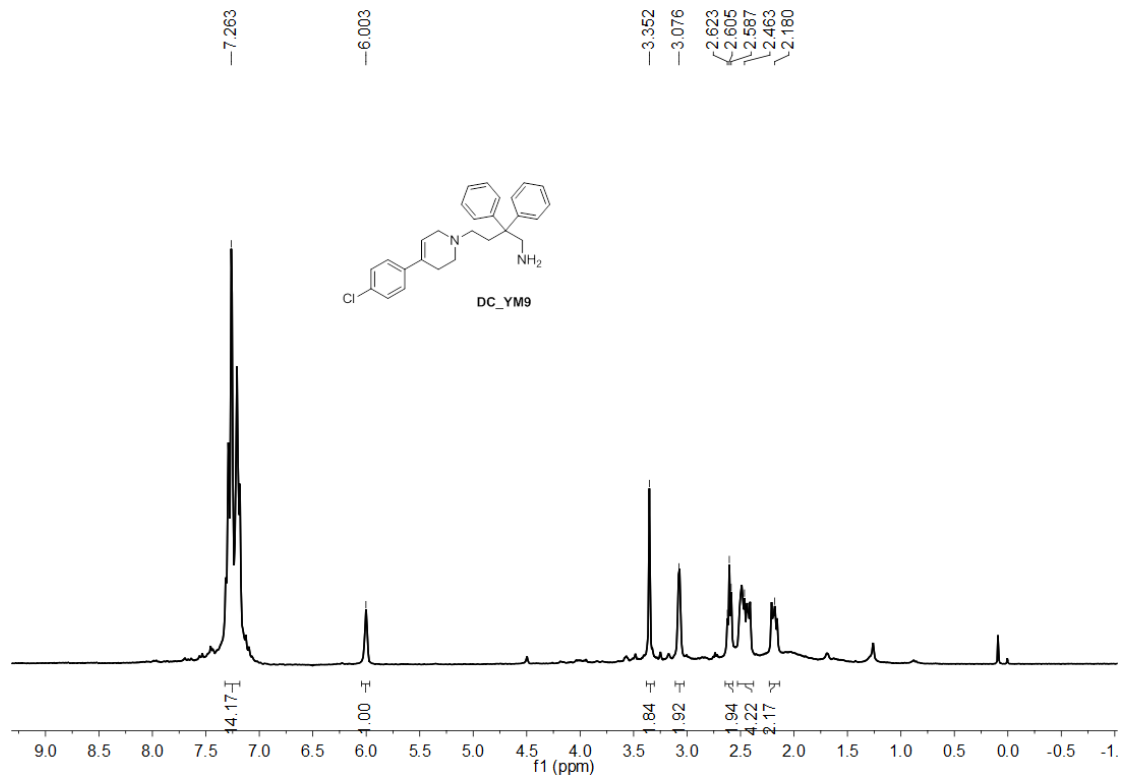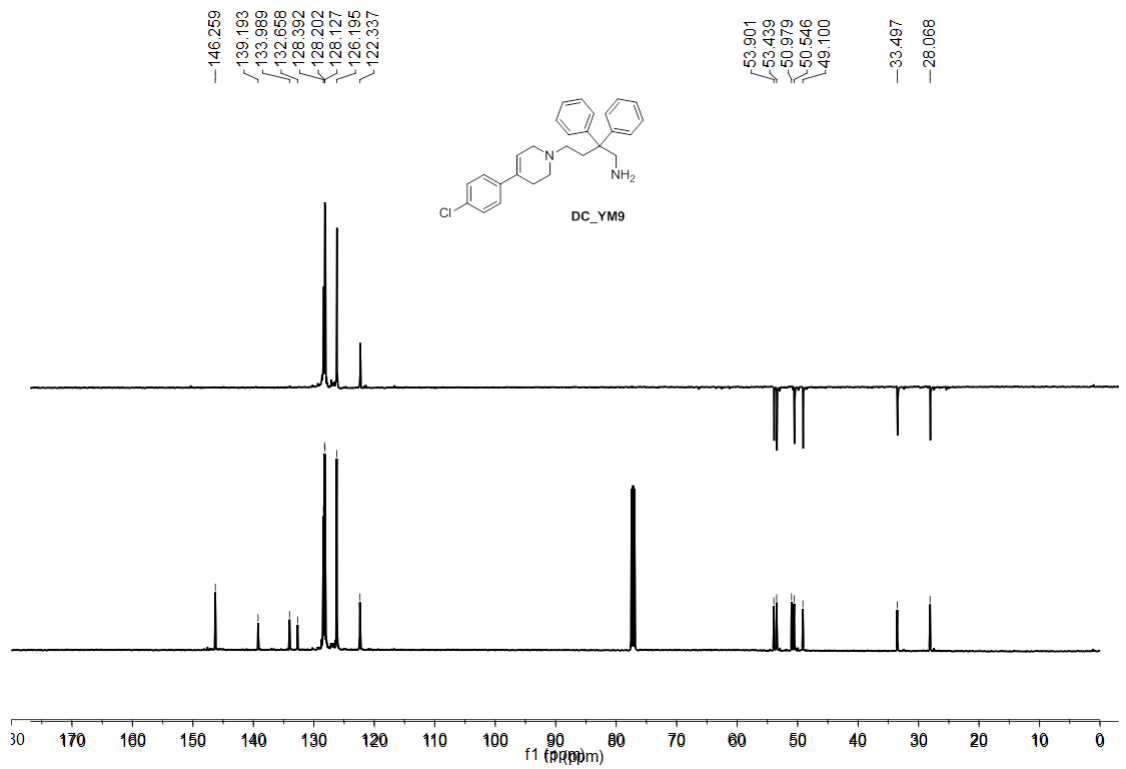

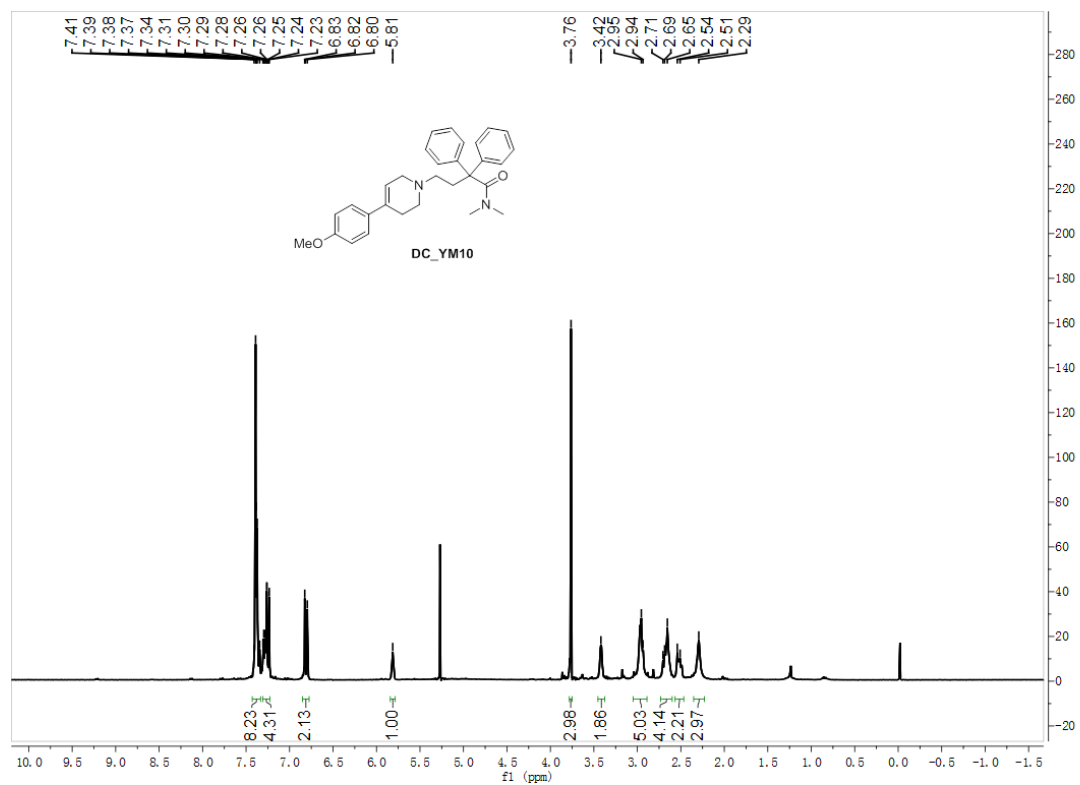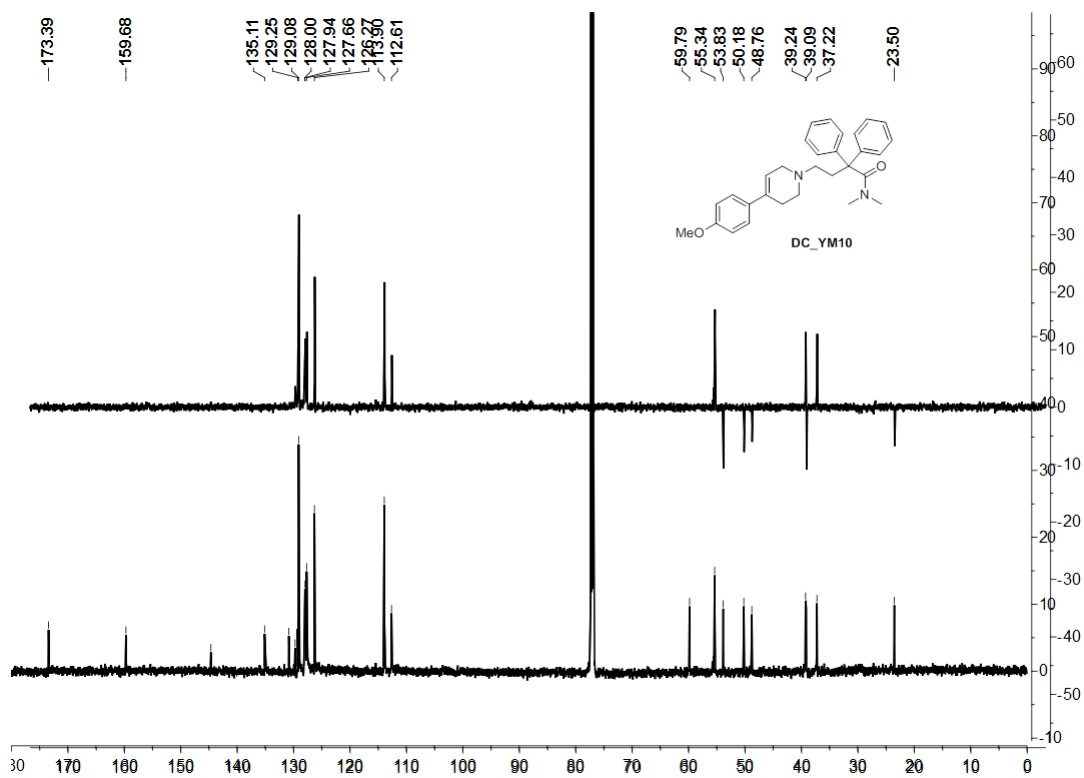

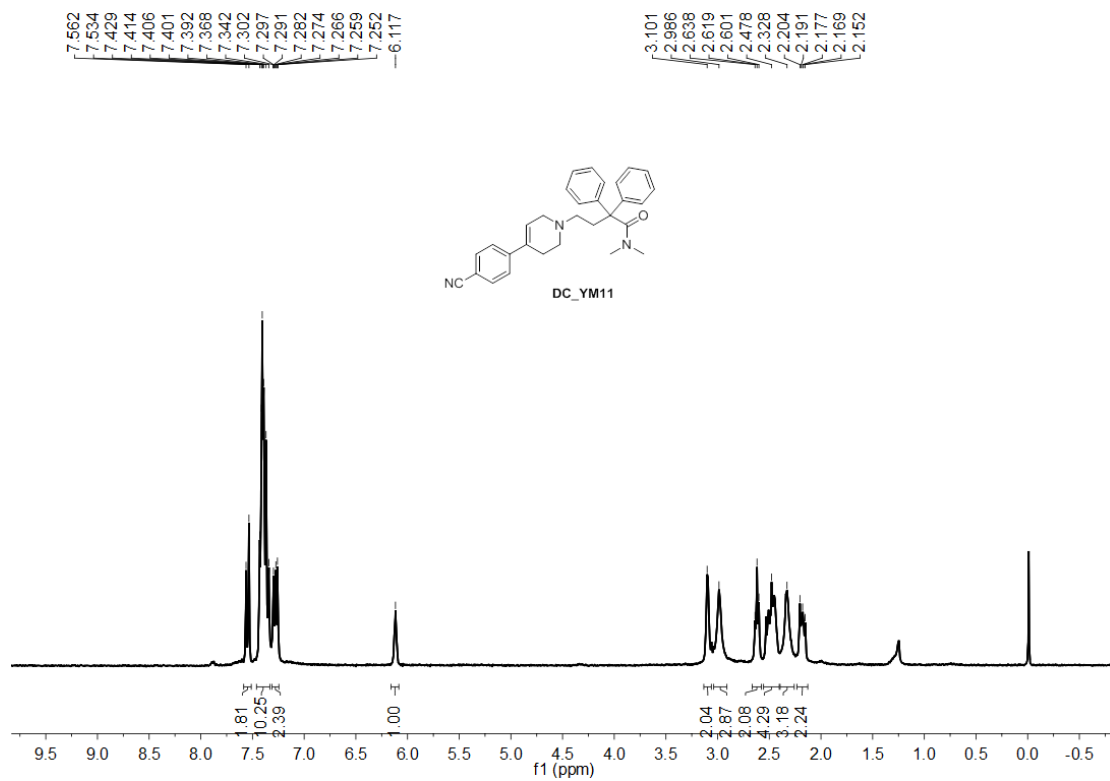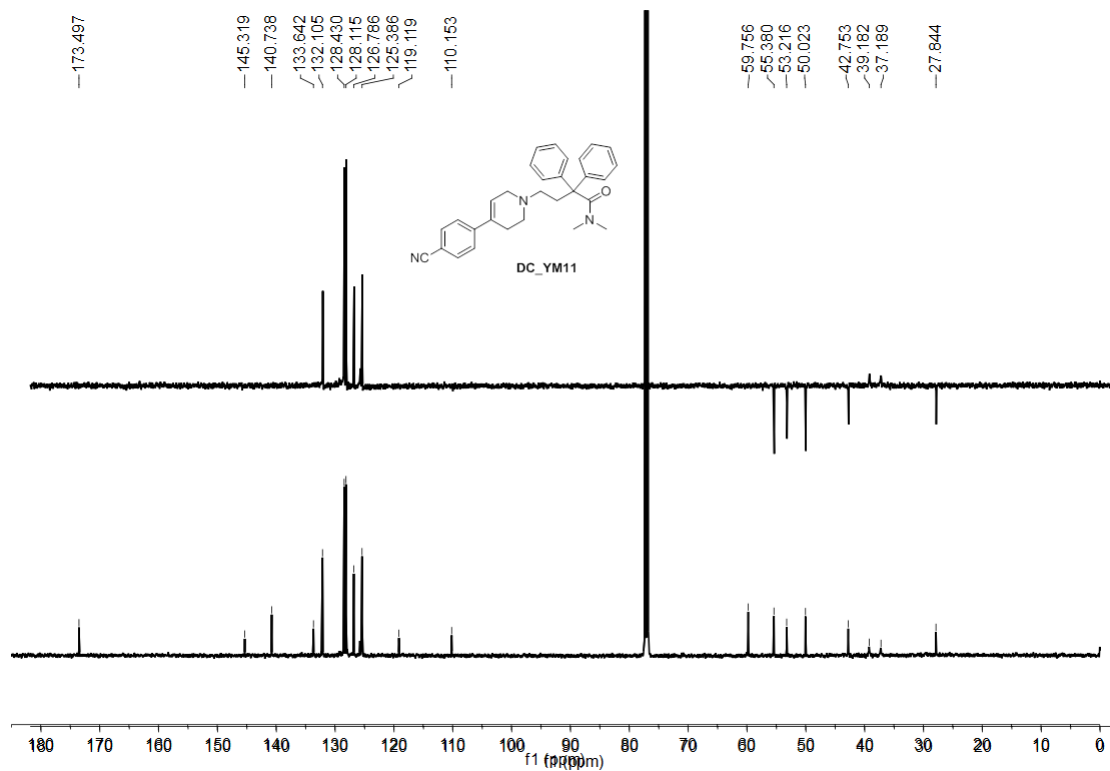

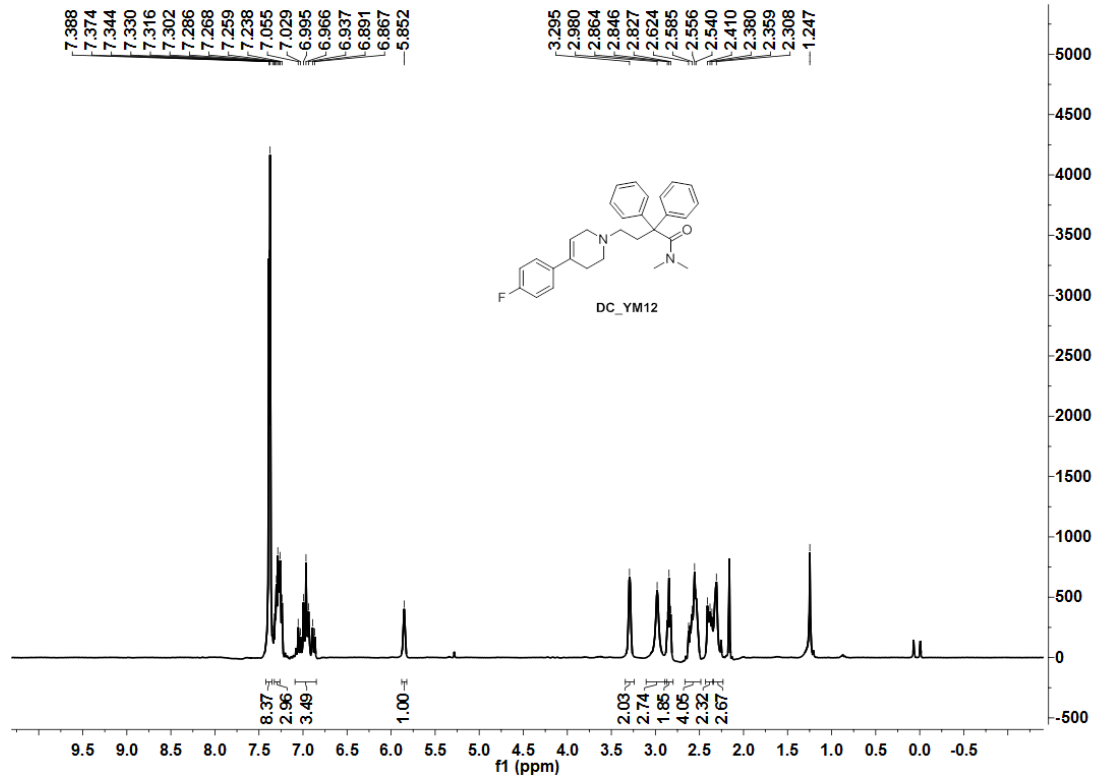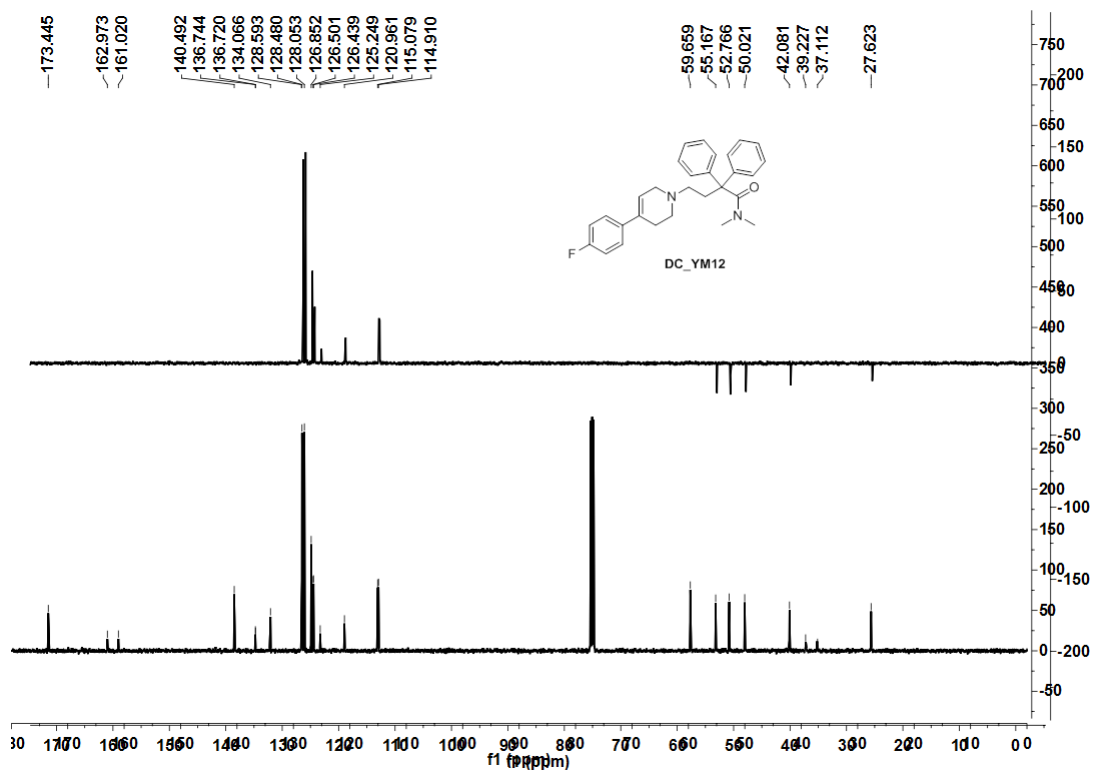

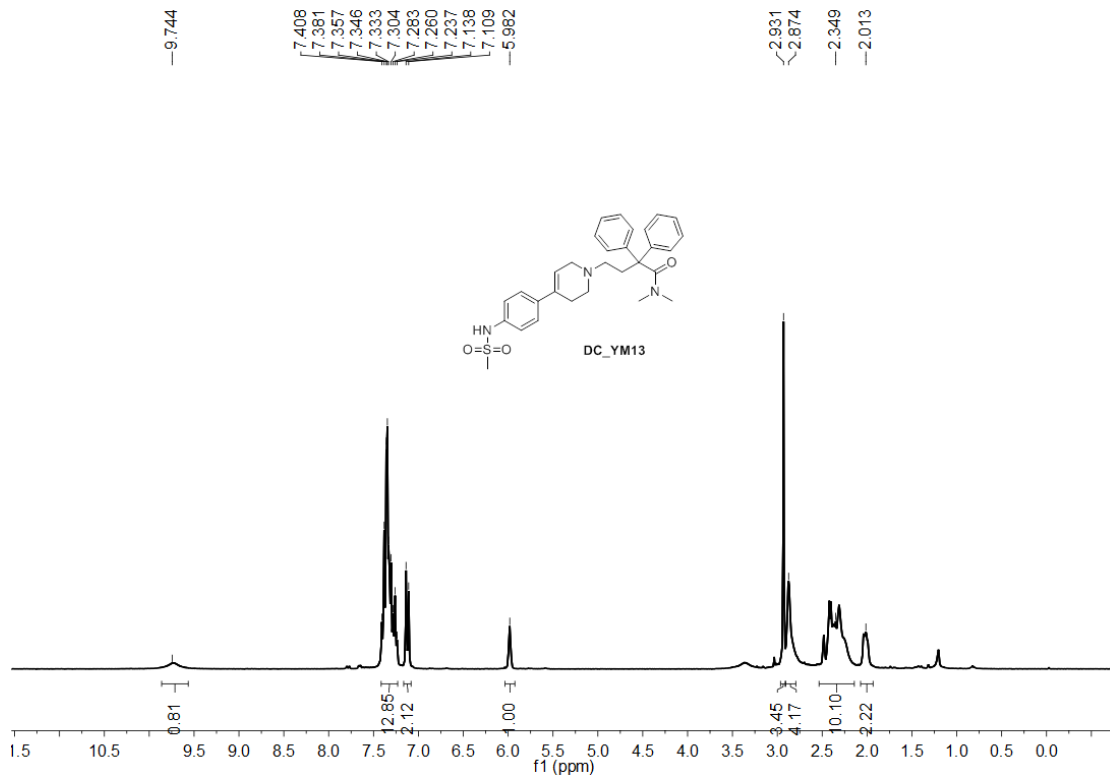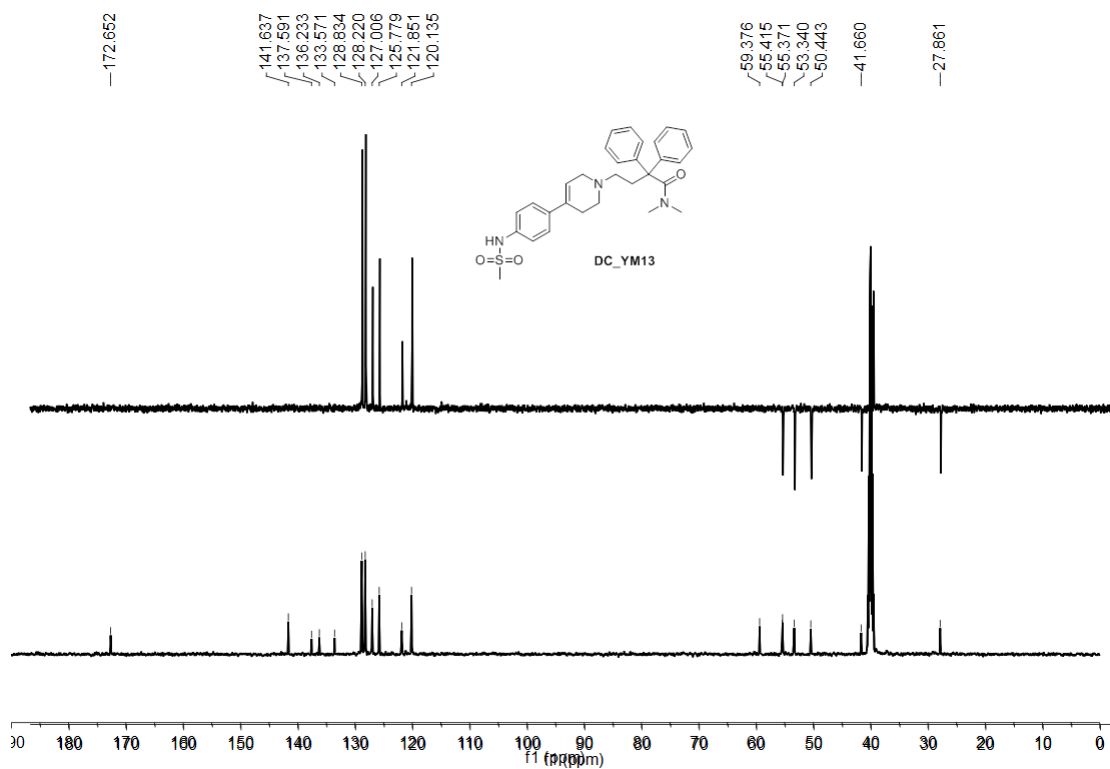

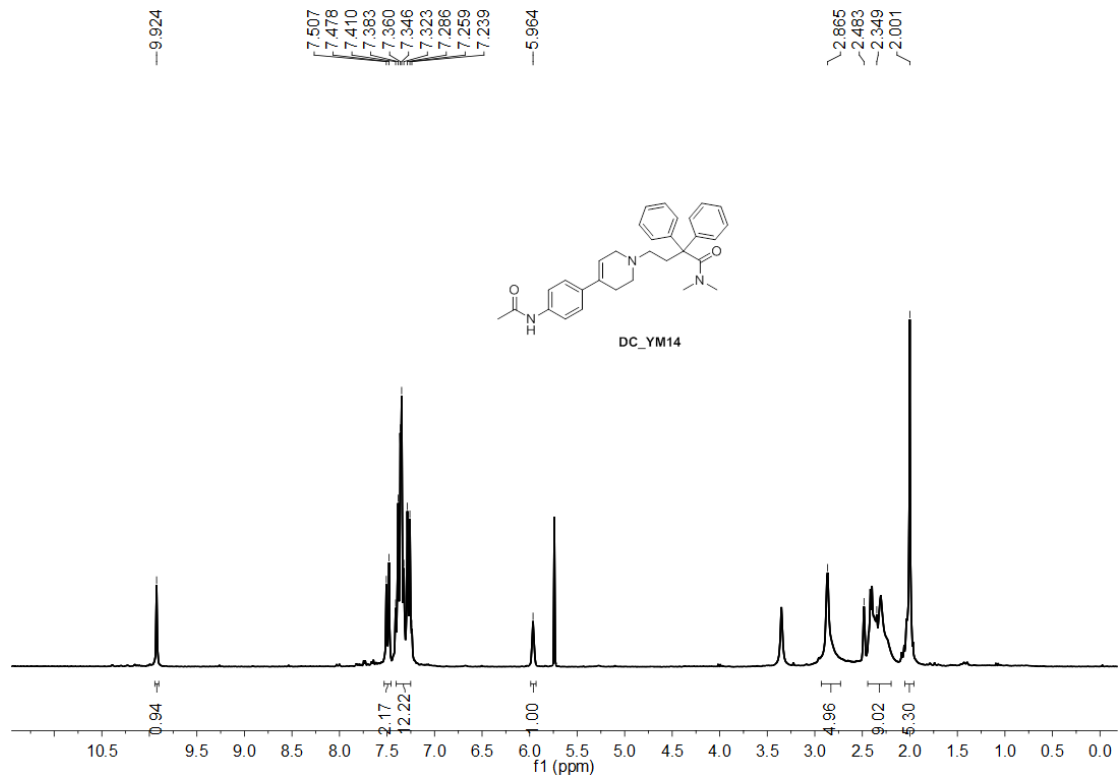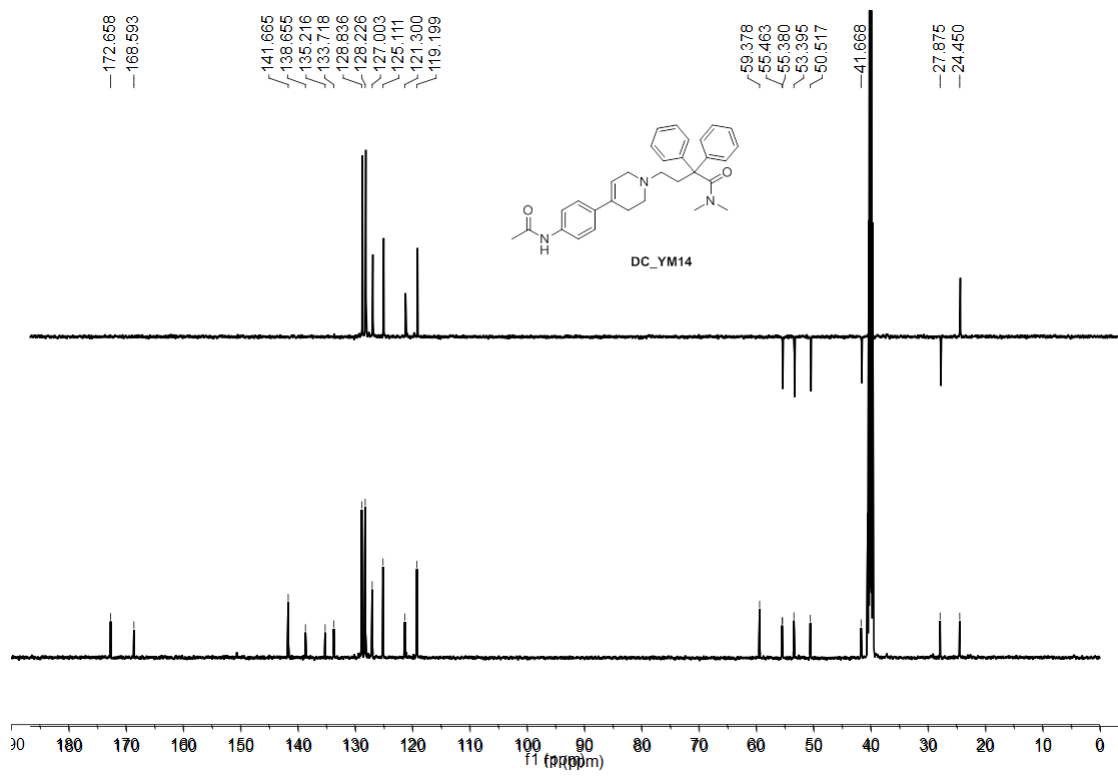

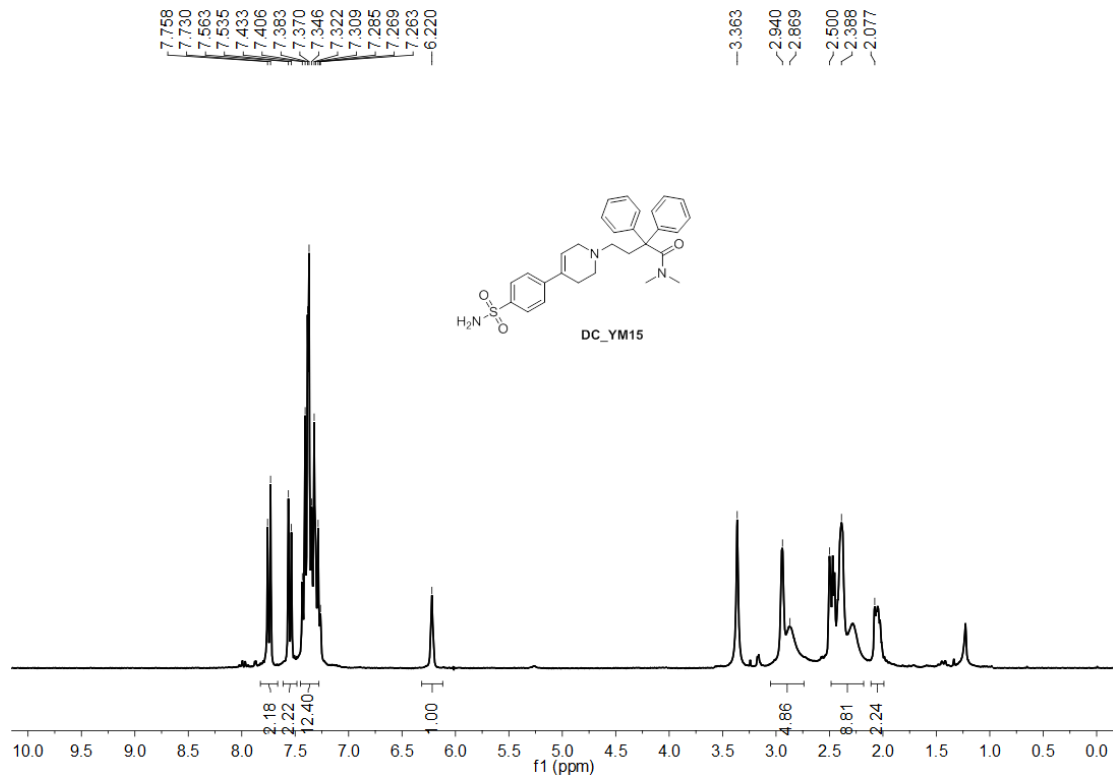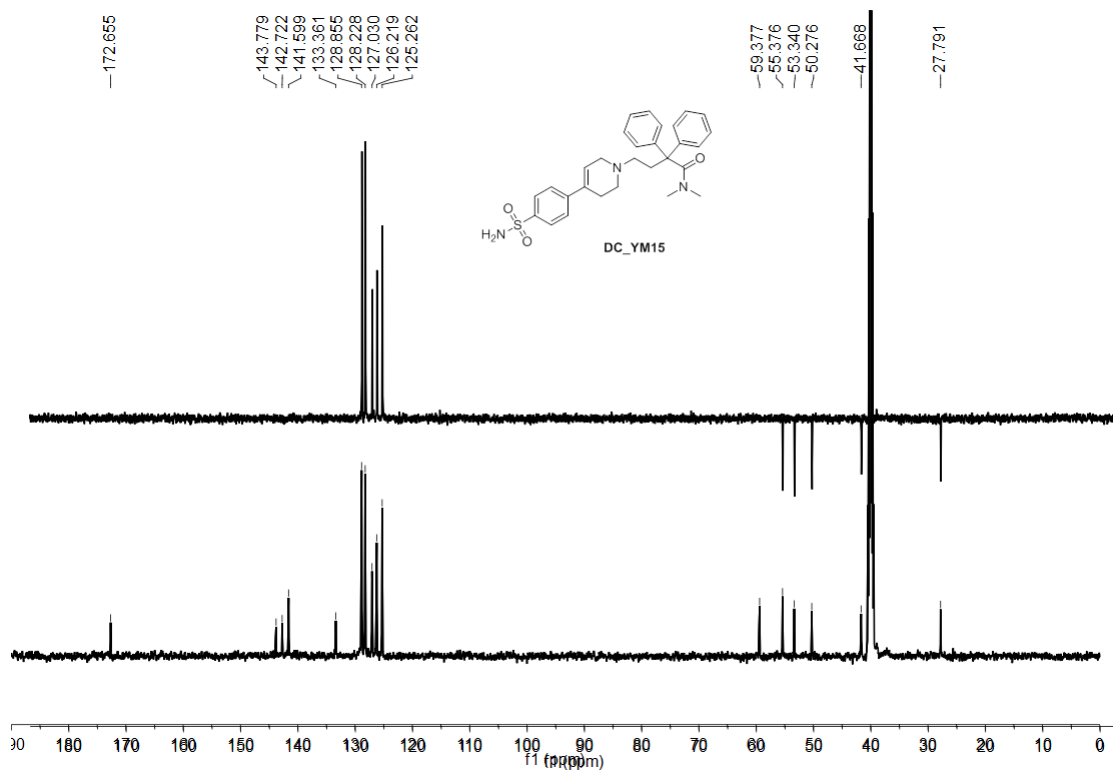

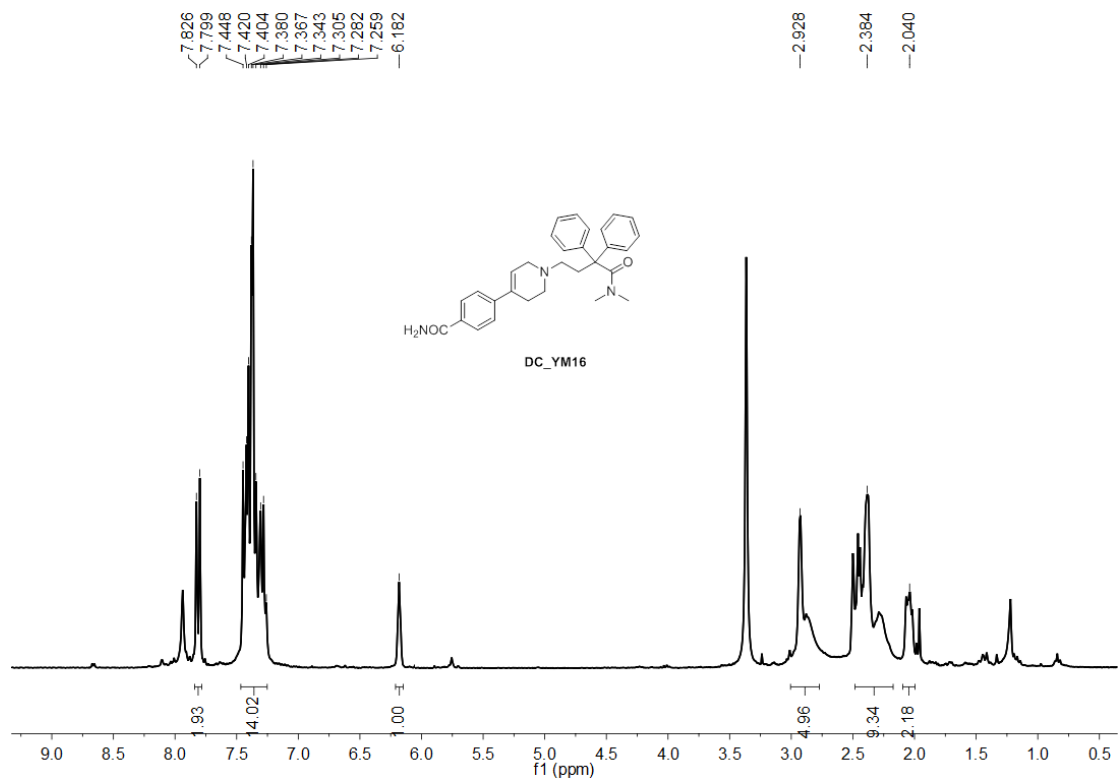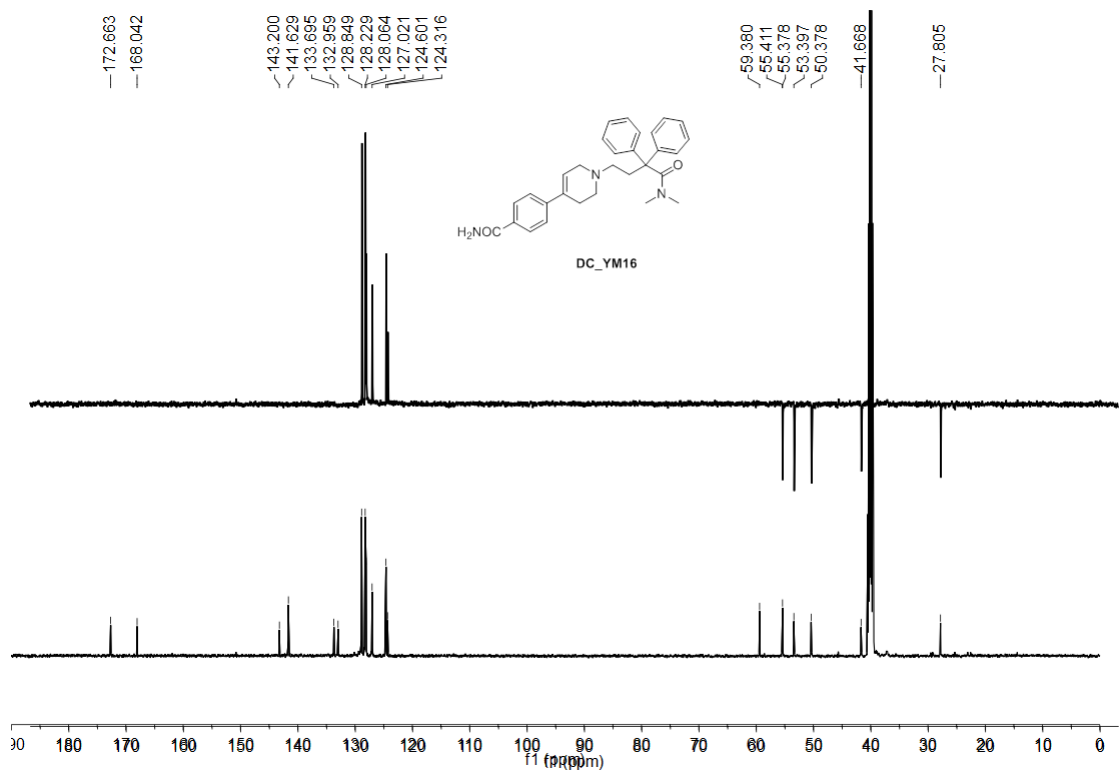



-11.221

7.923  
7.895  
7.856  
7.528  
7.484  
7.458  
7.434  
7.385  
7.376  
7.327  
-6.235

3.866  
3.816  
3.704  
3.628  
3.524  
3.483  
2.907  
2.724  
2.620  
2.563  
2.485  
2.221

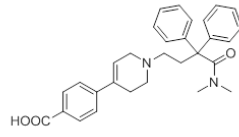

DC\_YM17

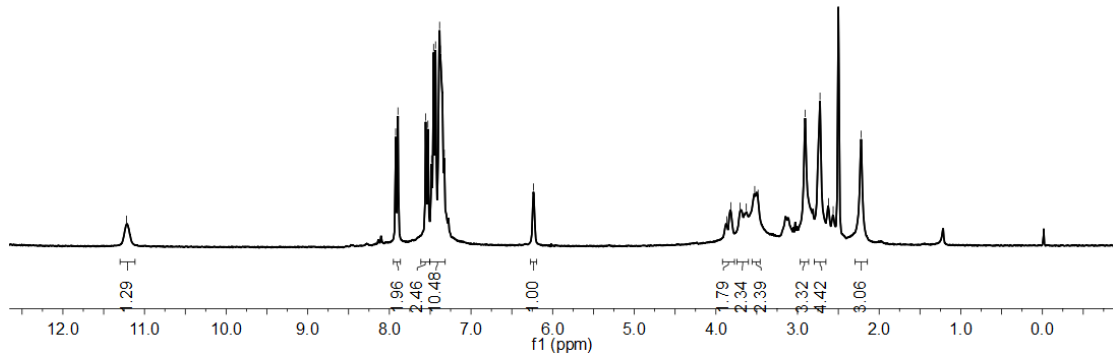

-172.554  
-167.406

142.701  
140.137  
139.843  
133.623  
130.399  
130.031  
129.296  
129.040  
128.320  
128.275  
127.856  
127.701  
125.317  
119.114

59.563  
53.593  
50.128  
48.002  
39.011  
38.365  
37.143  
-23.844

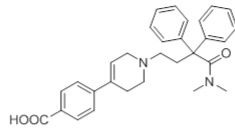

DC\_YM17

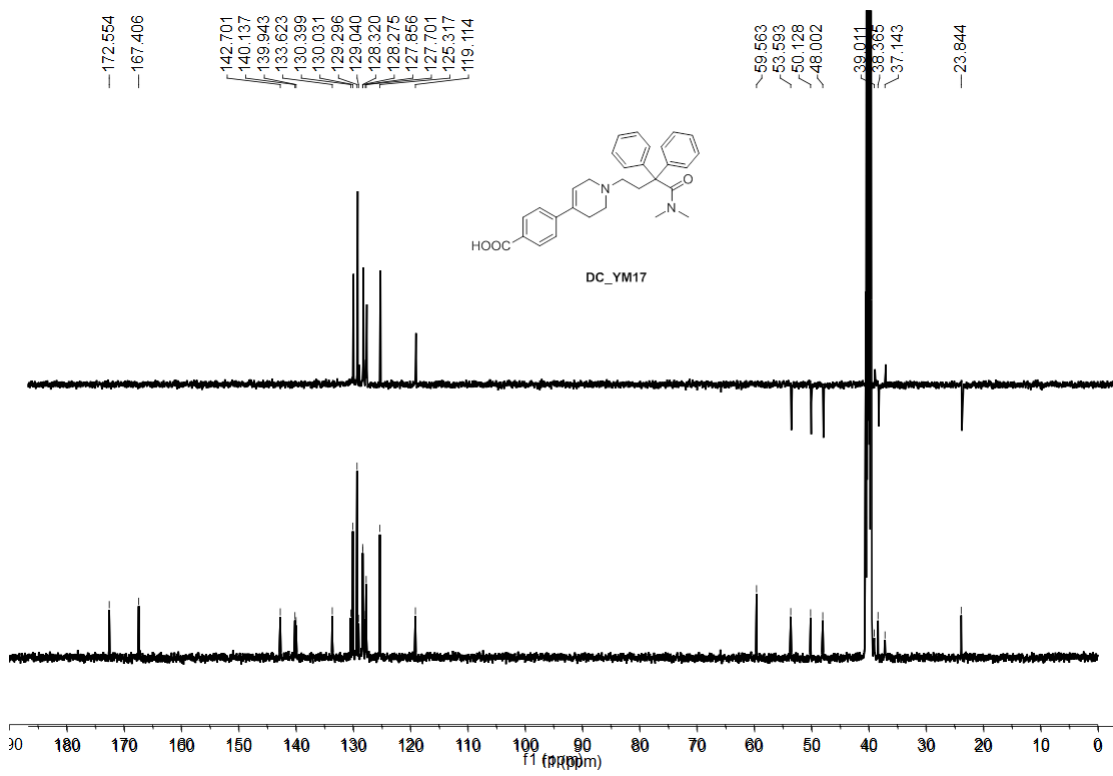

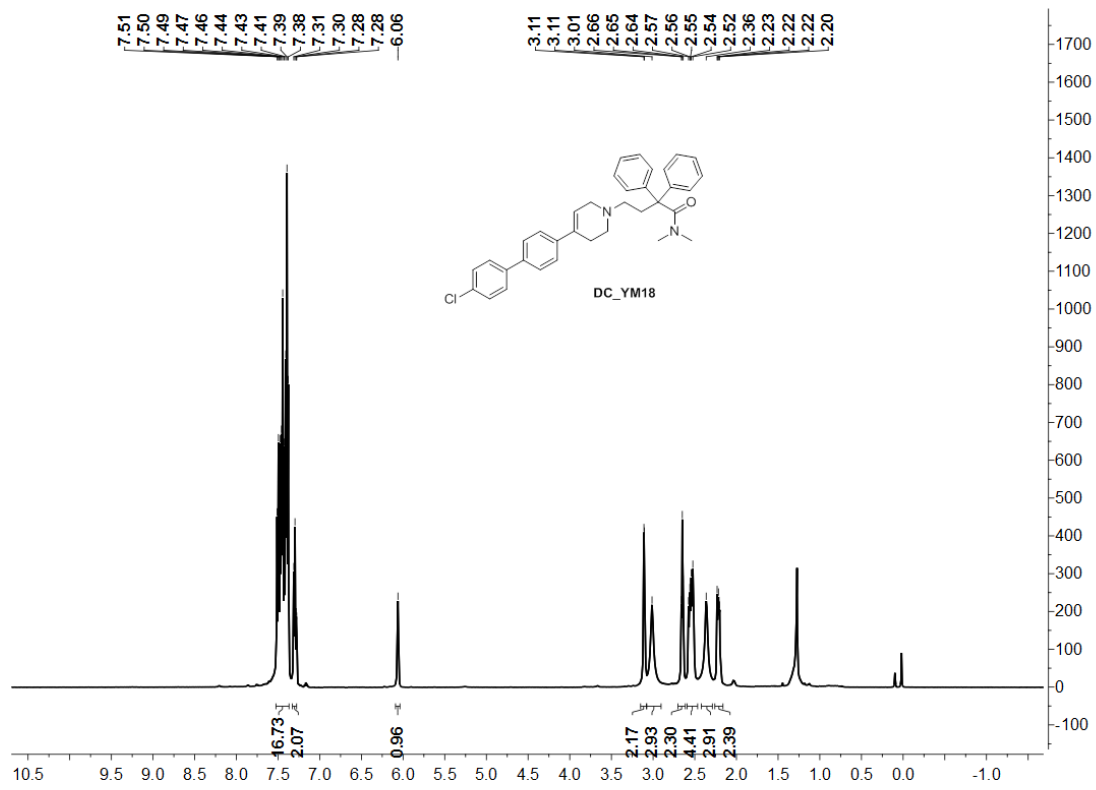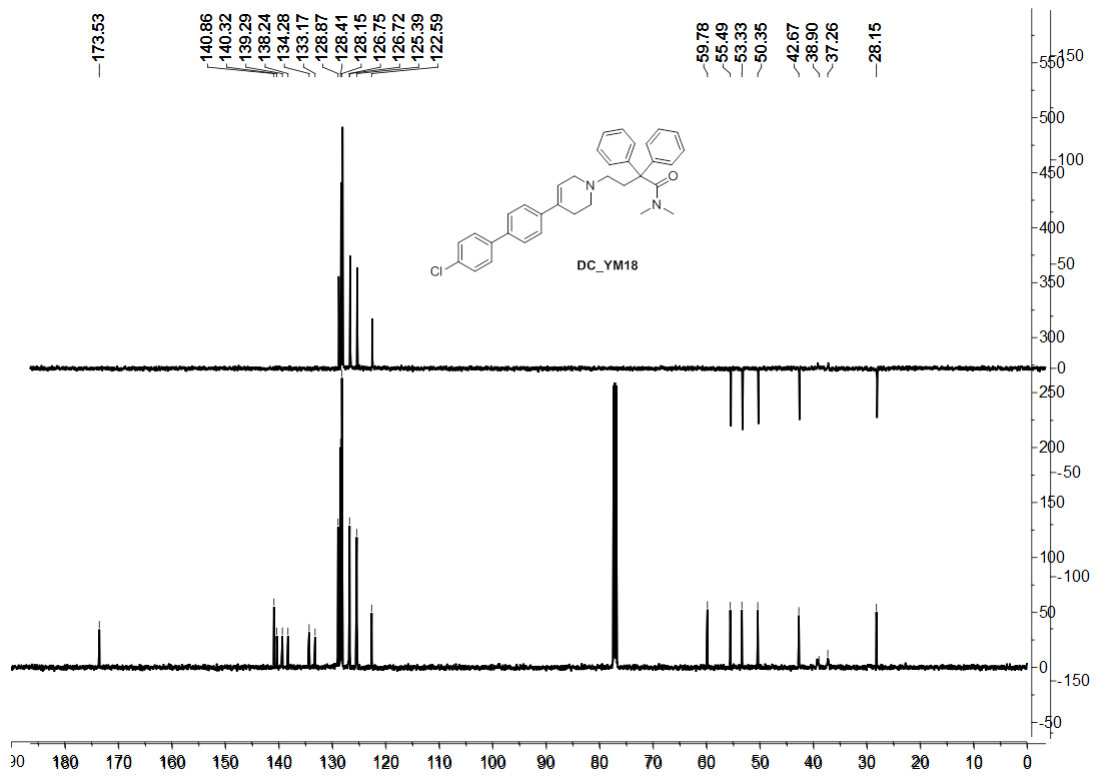

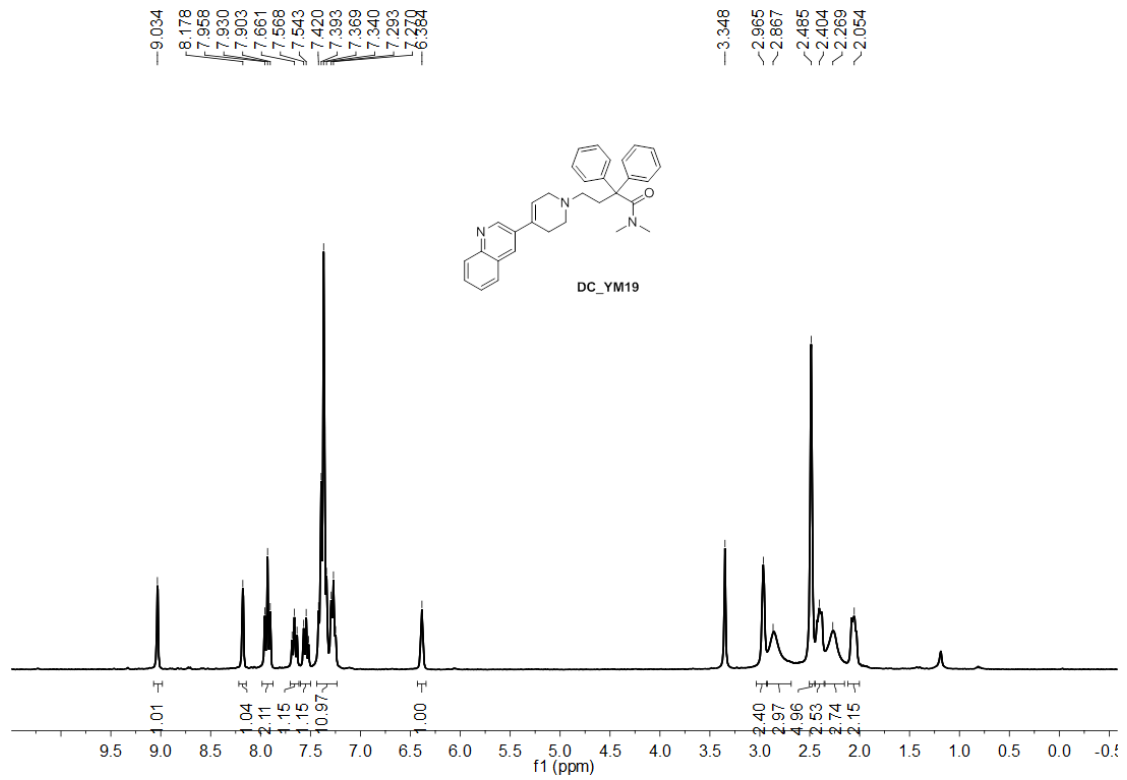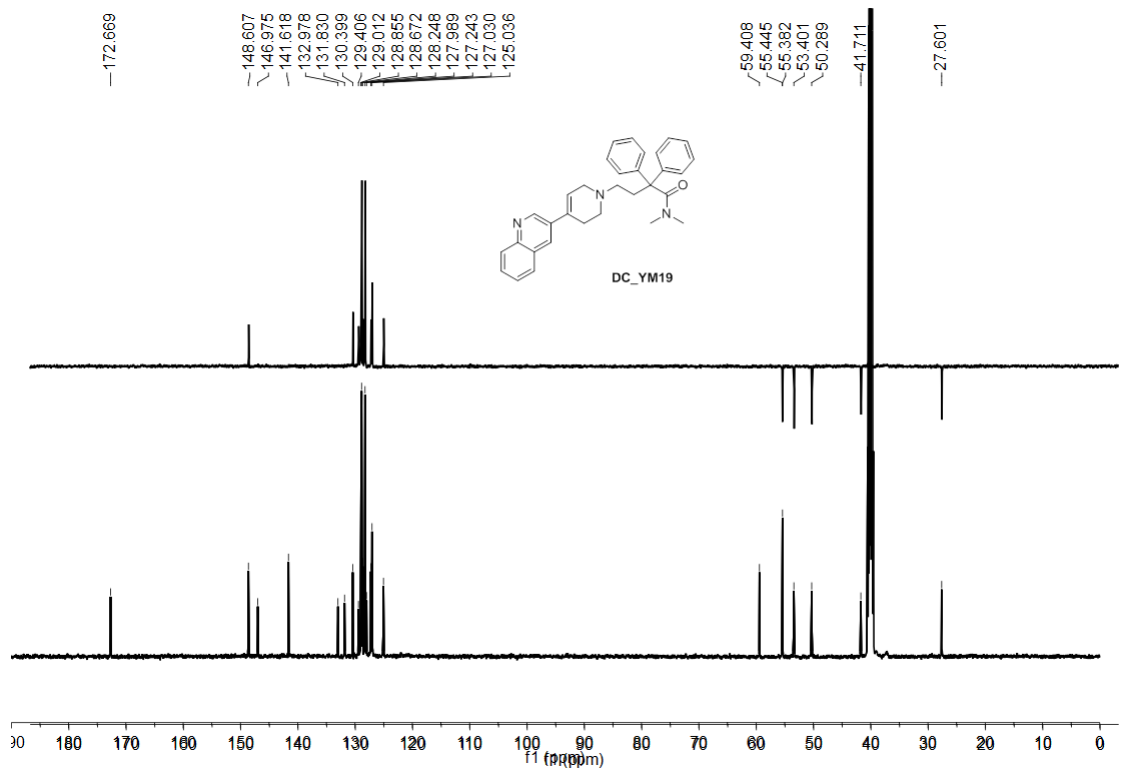

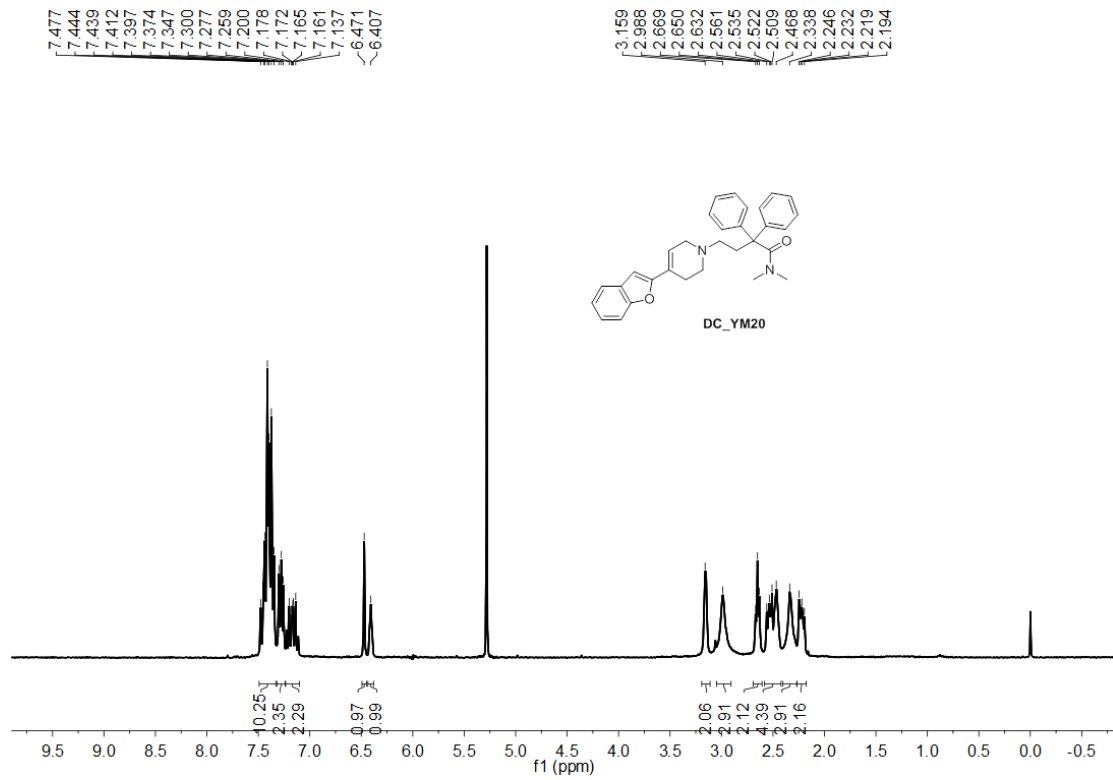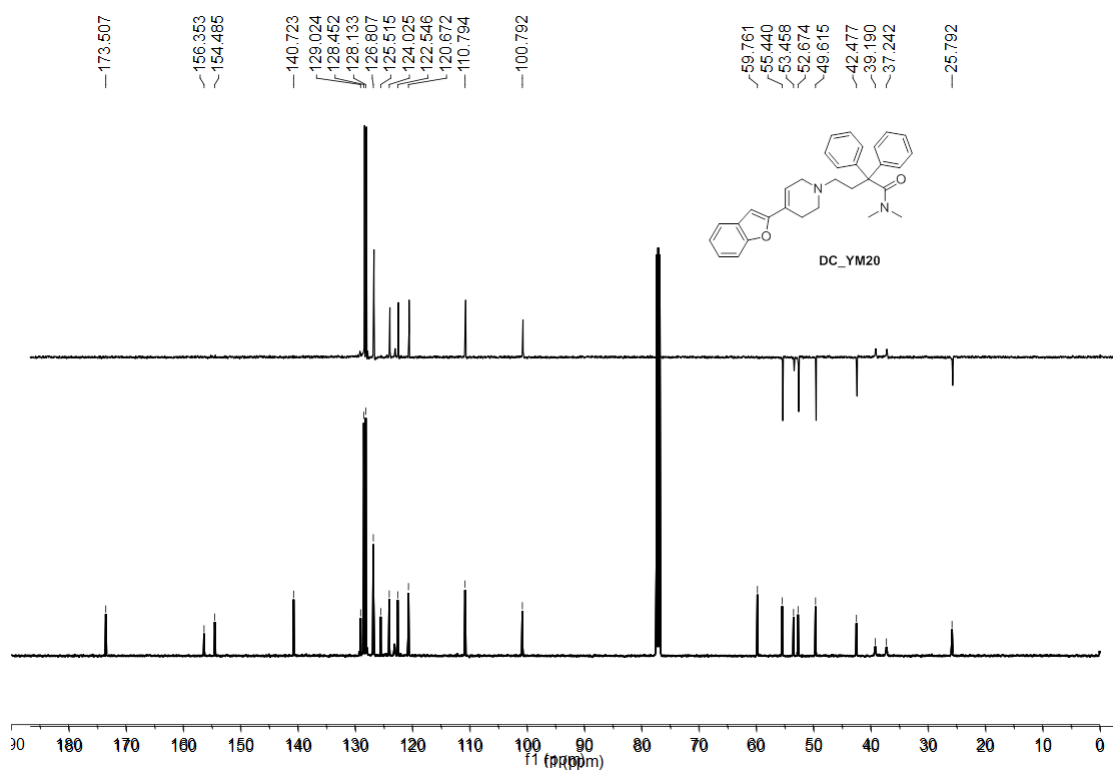

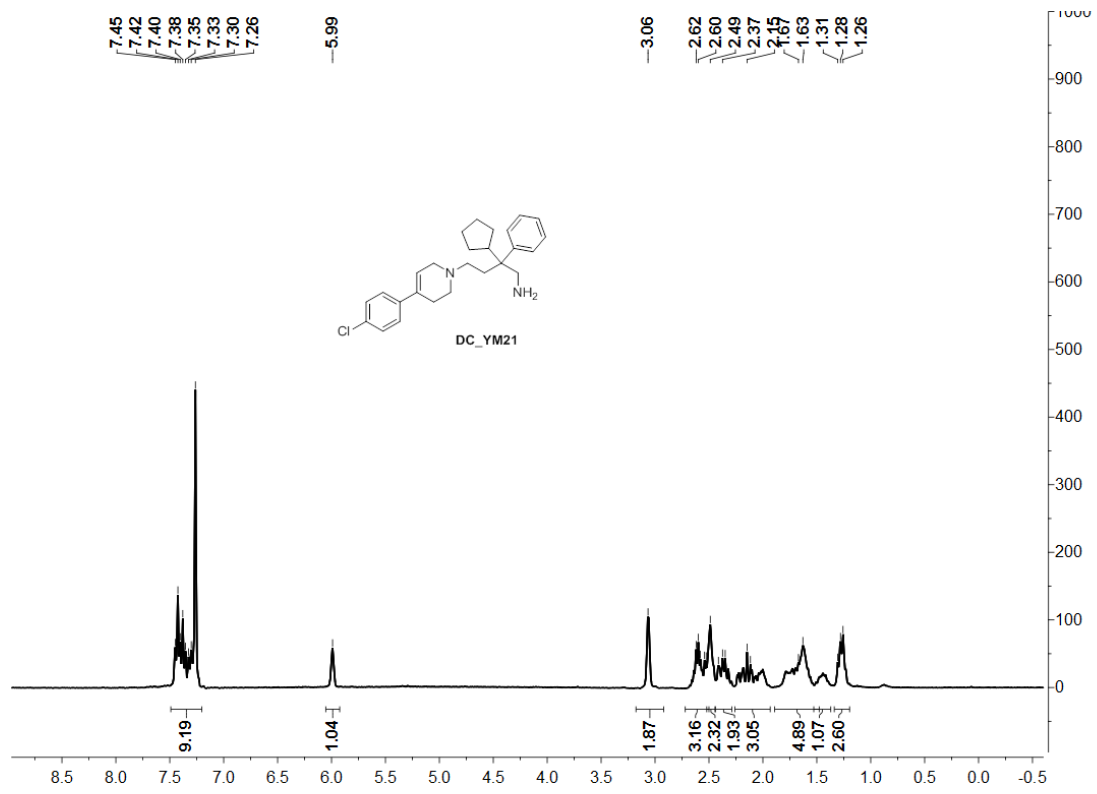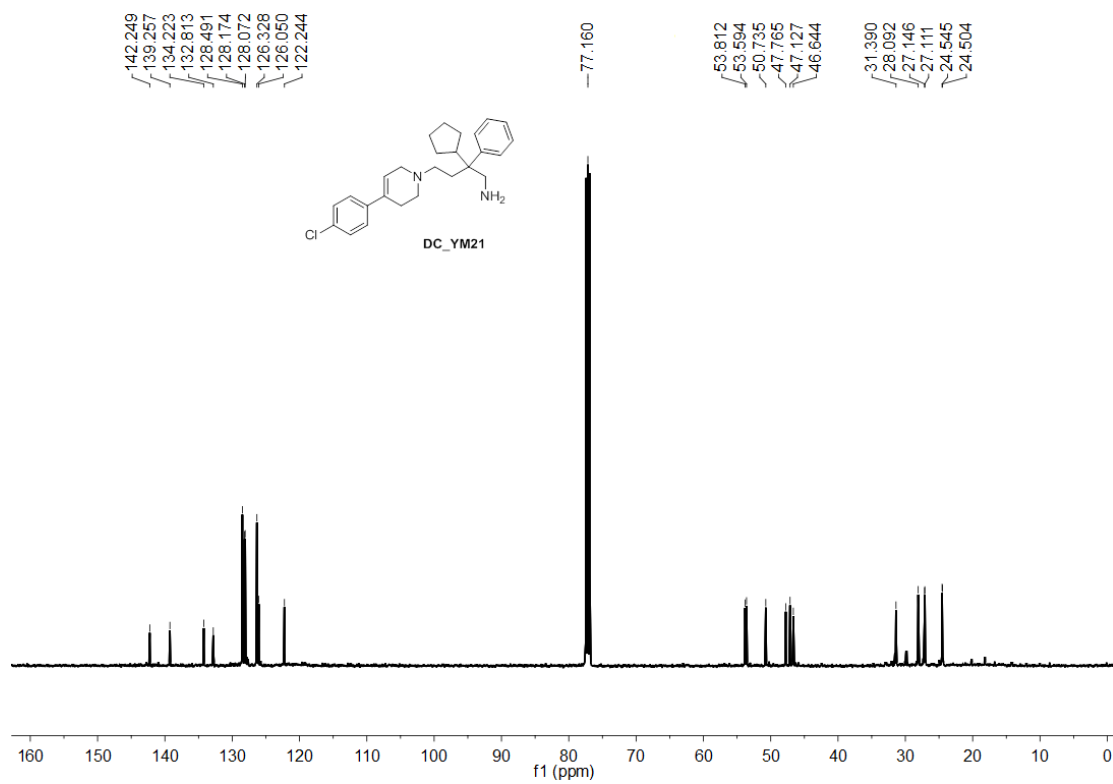

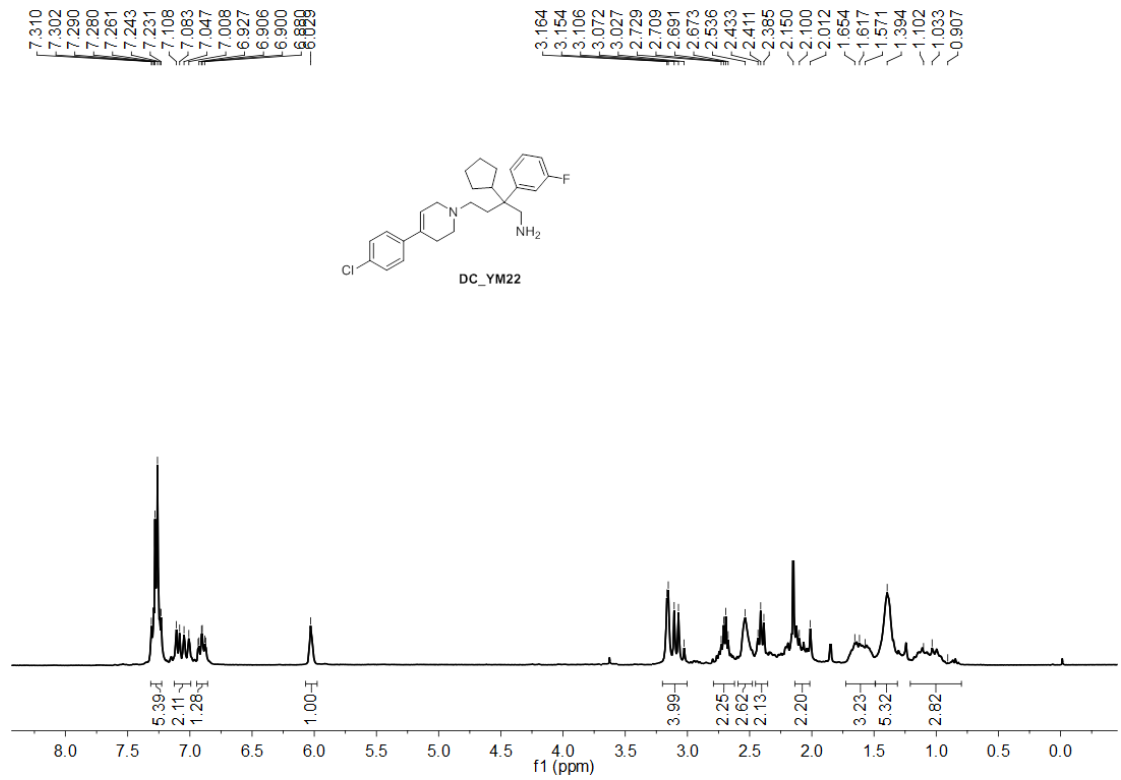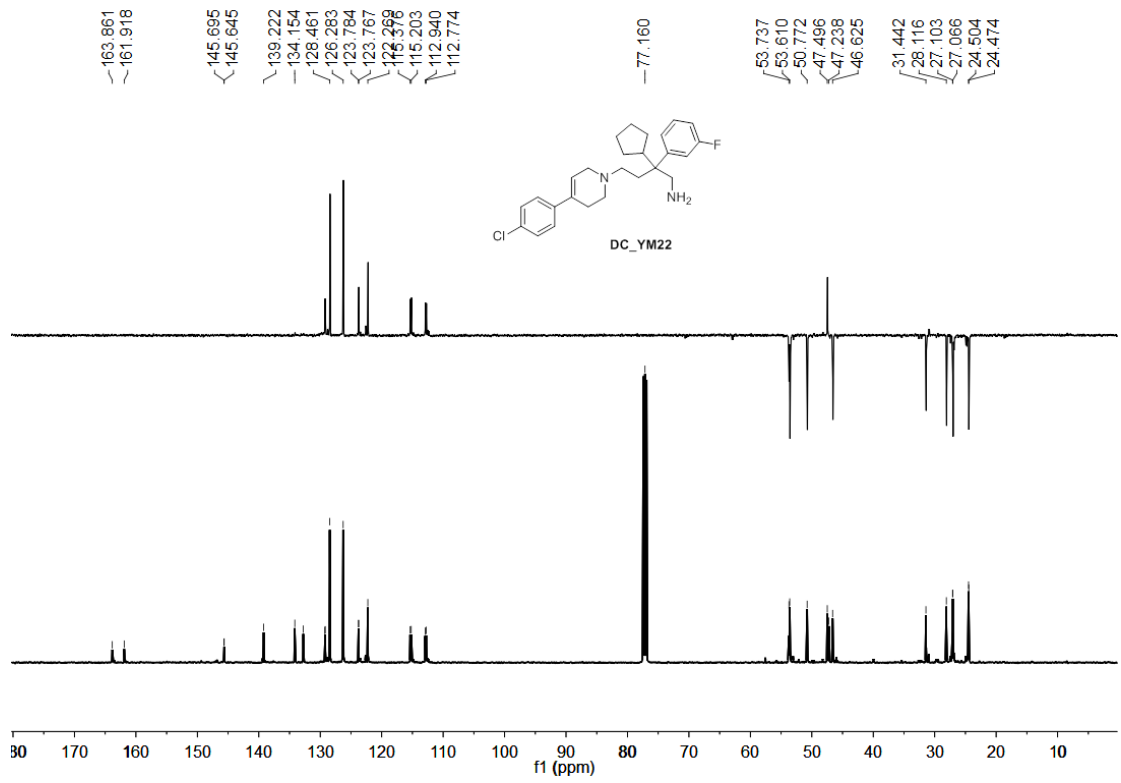

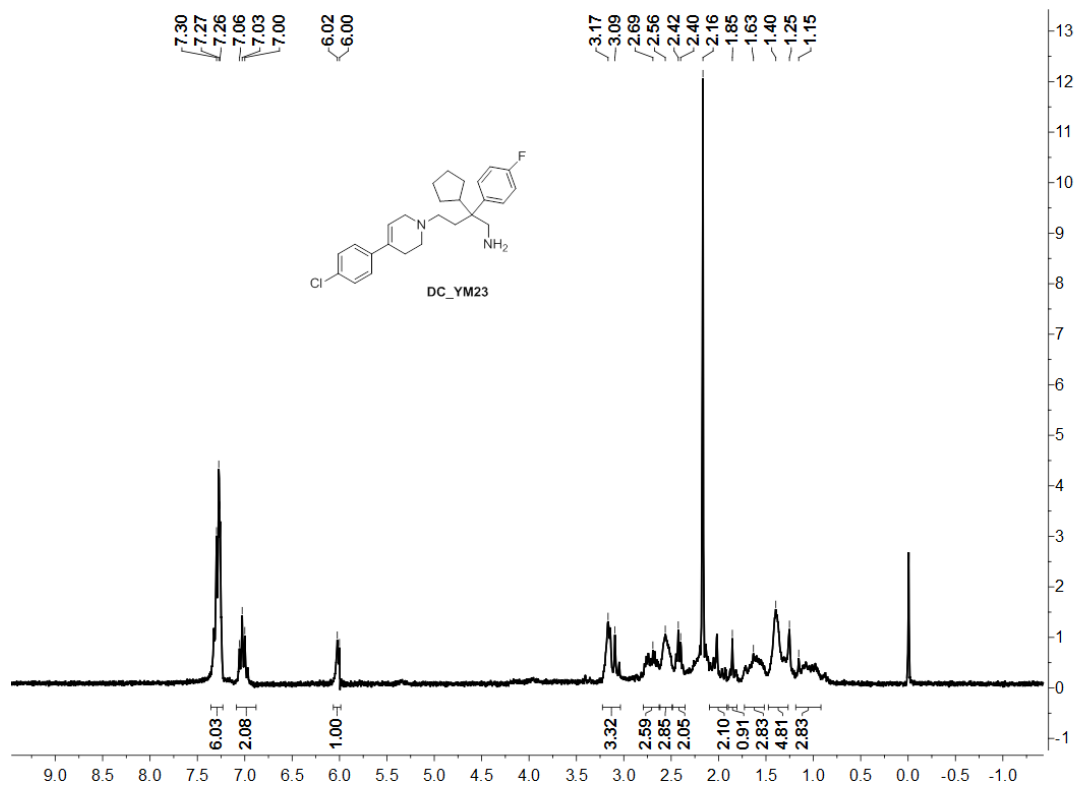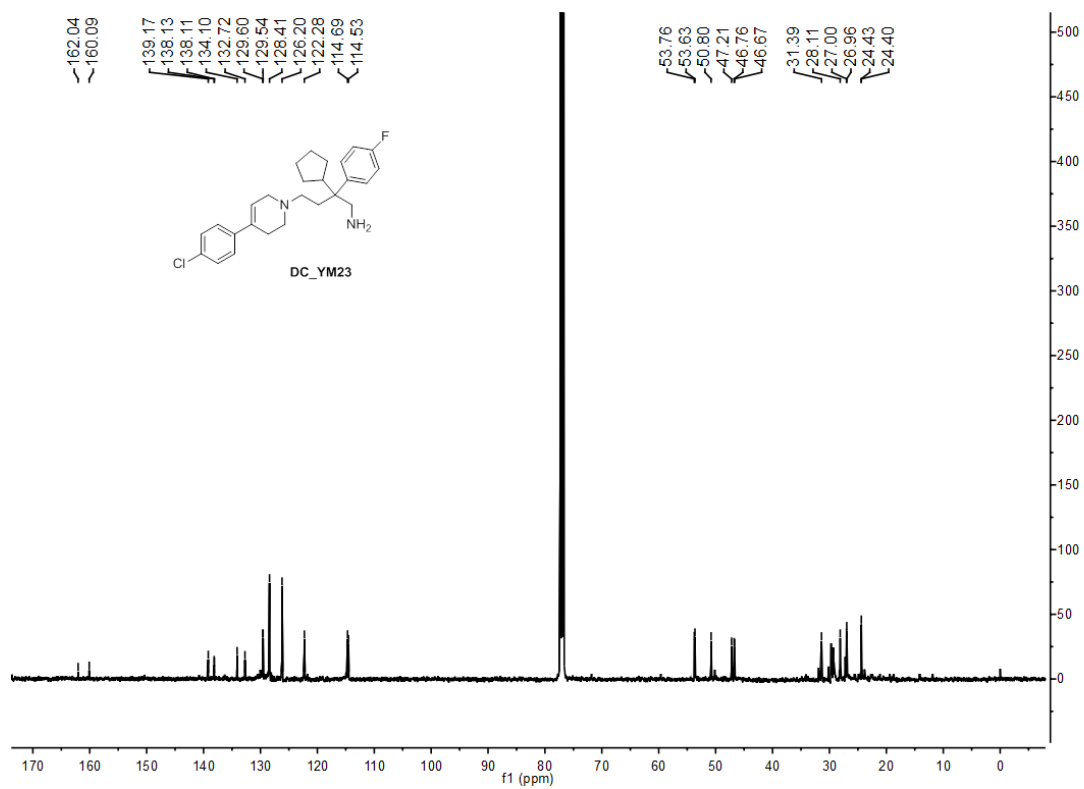

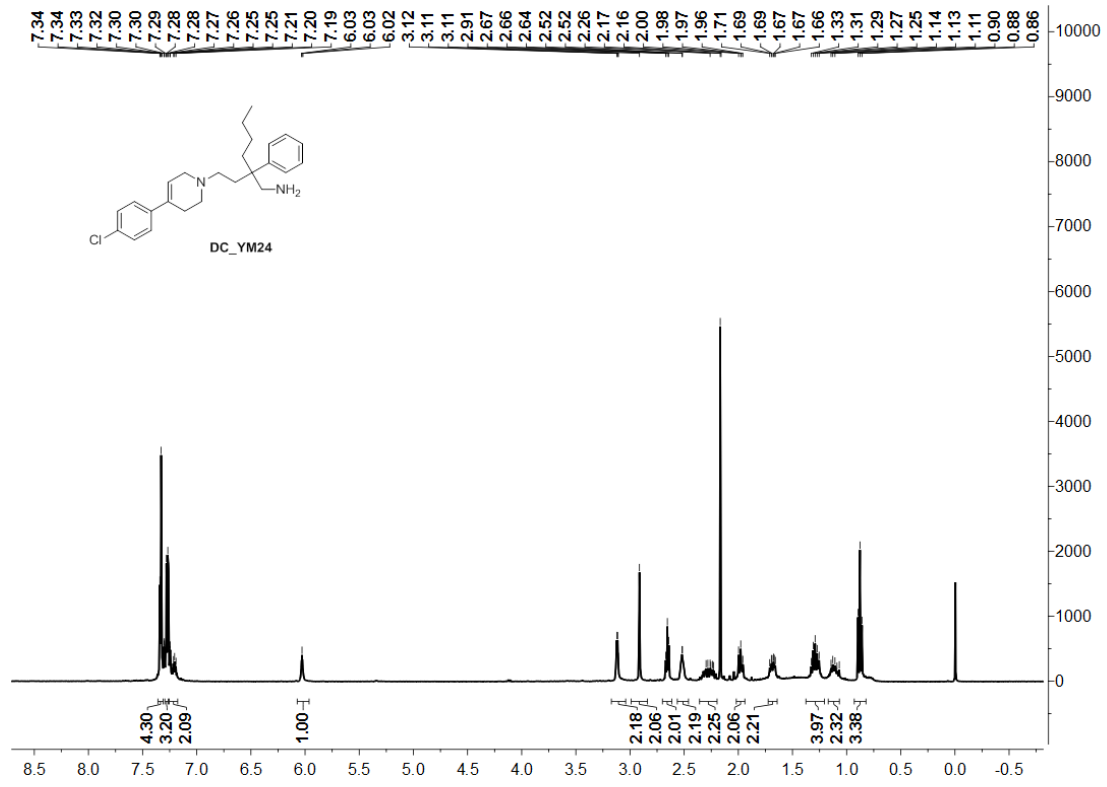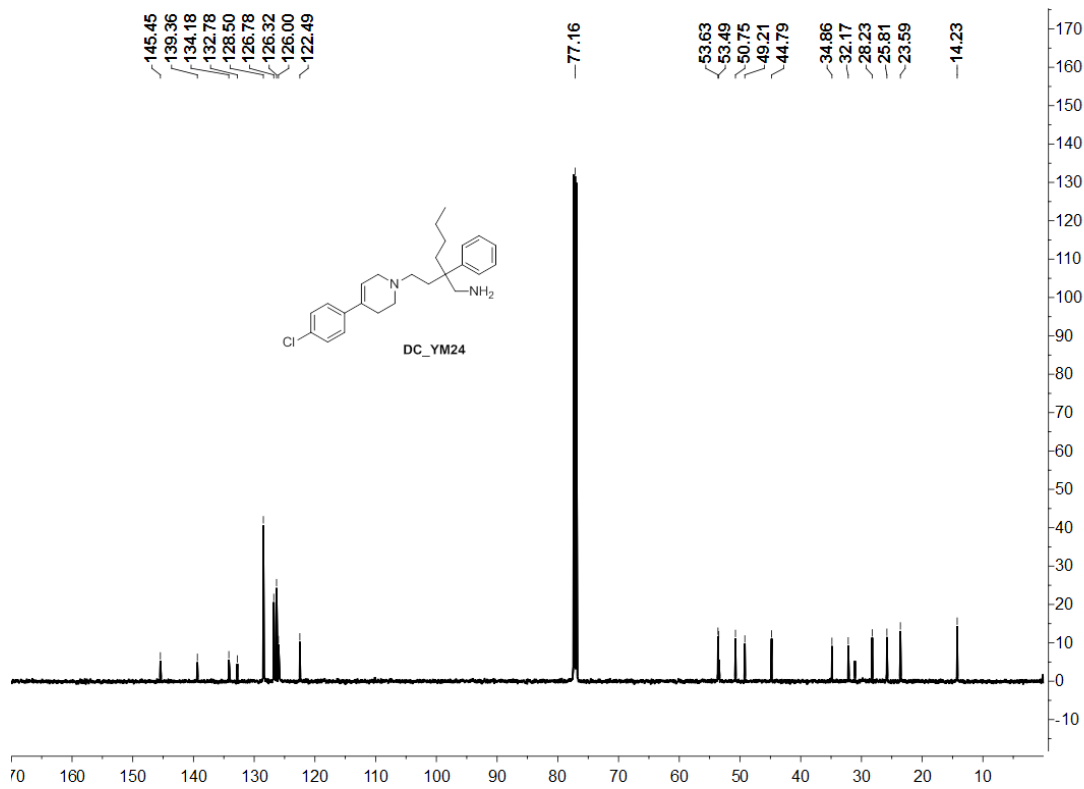



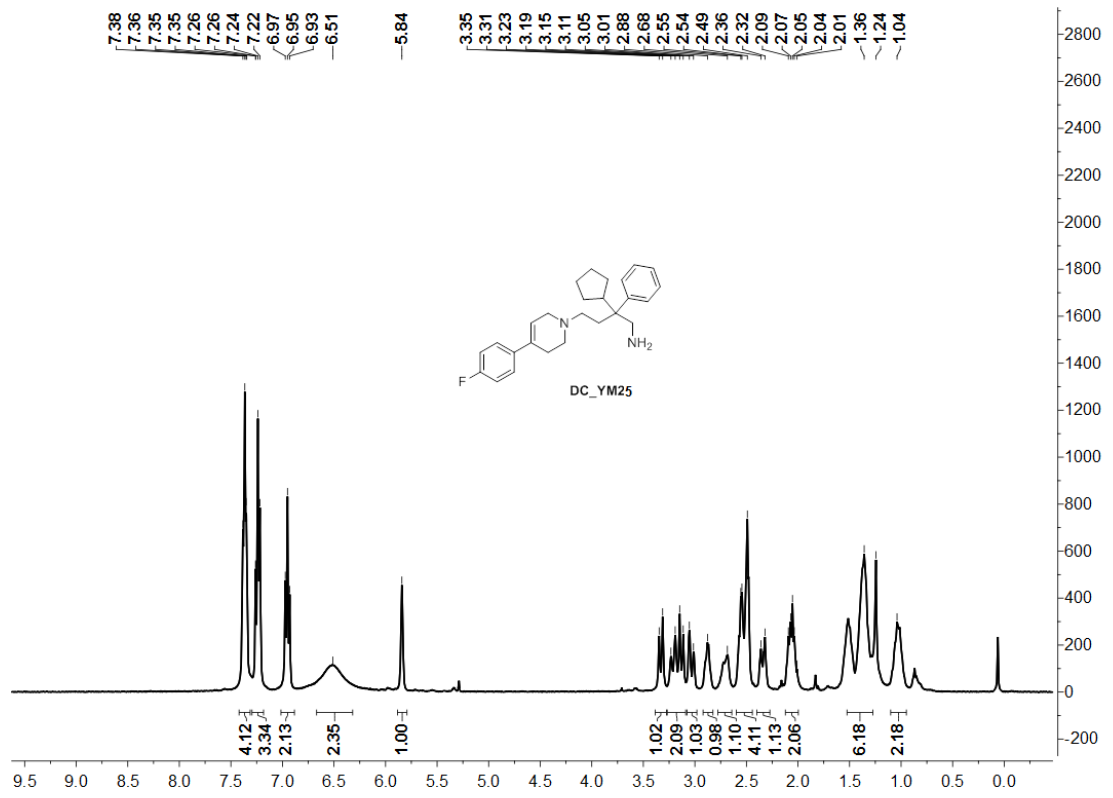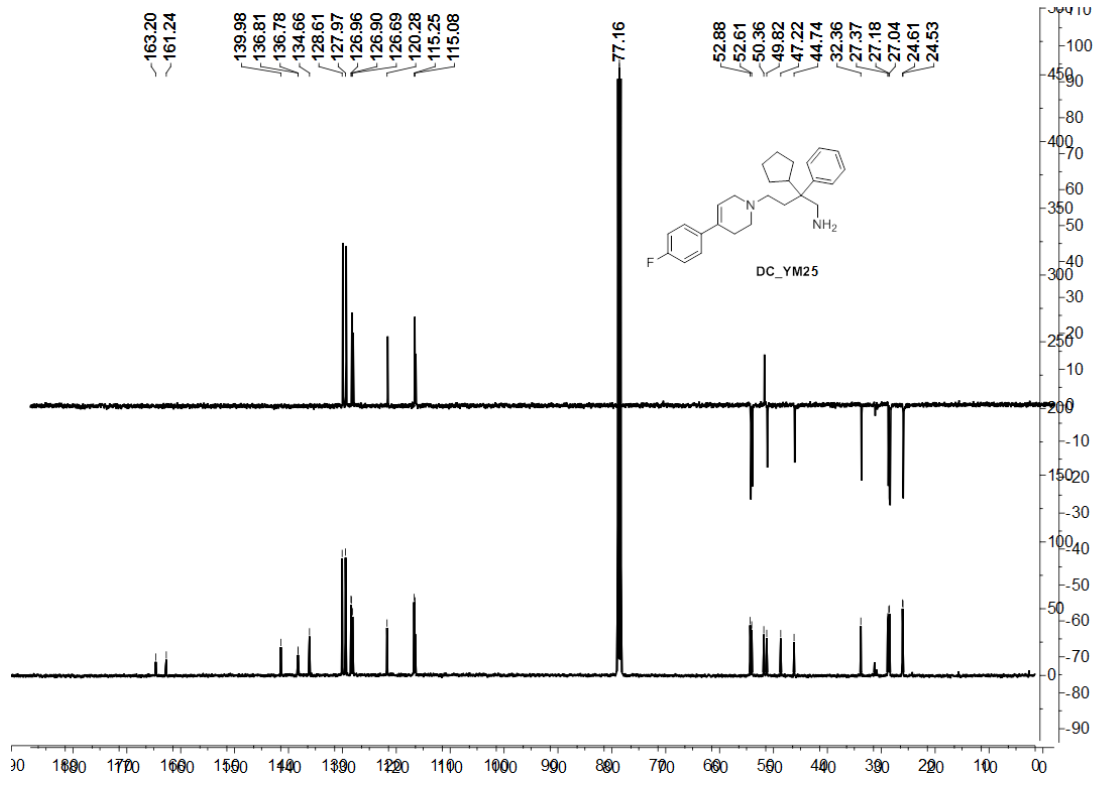

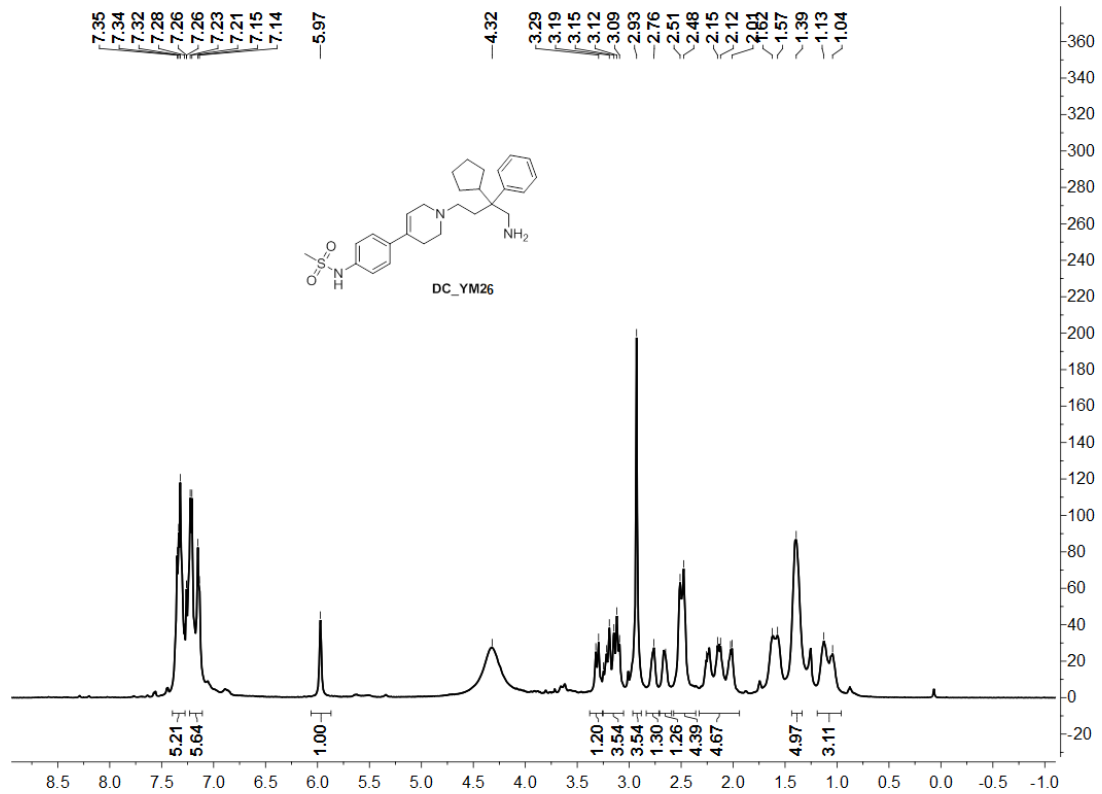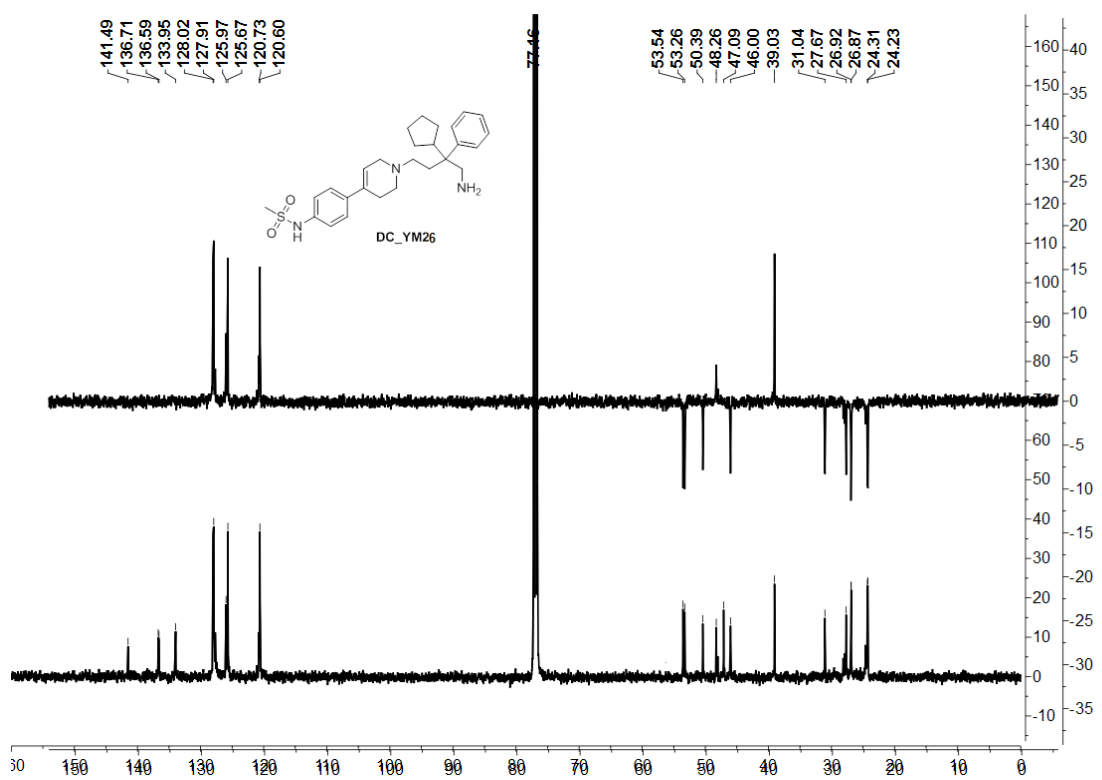

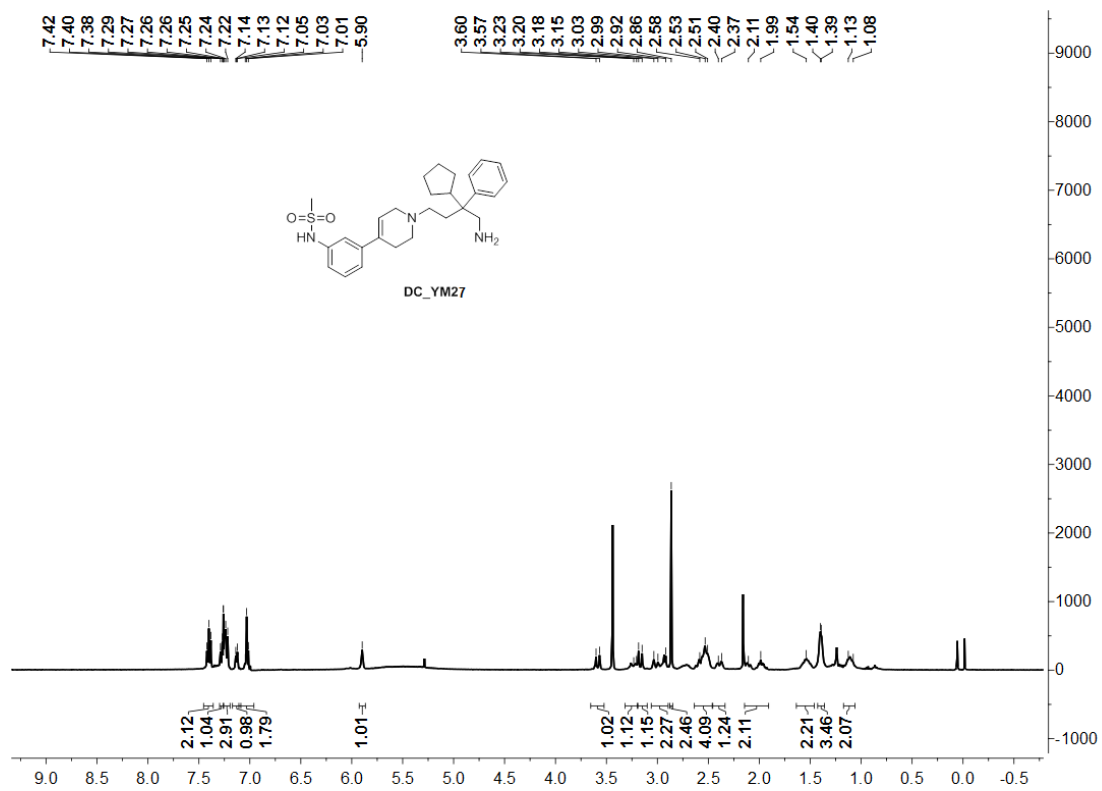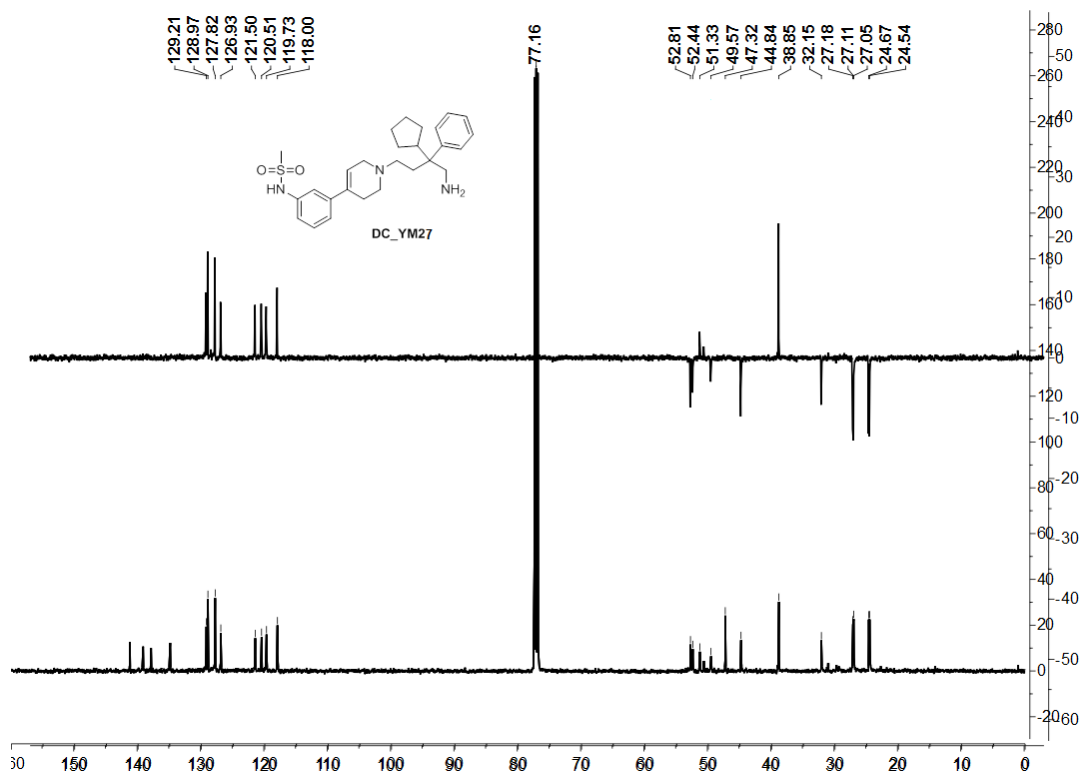

Supplement: c6ob01248e1.pdf [file c6ob01248e1.pdf]
